# 1 **Synapse-specific Opioid Modulation of Thalamo-cortico-striatal Circuits**

2 William T. Birdsong<sup>1,4,\*</sup>, Bart C. Jongbloets<sup>1,\*</sup>, Kim A. Engeln<sup>1</sup>, Dong Wang<sup>2</sup>, Gregory  
3 Scherrer<sup>2,3</sup>, and Tianyi Mao<sup>1</sup>

4 *1. Vollum Institute, Oregon Health & Science University, Portland, OR 97239, USA*

5 *2. Department of Anesthesiology, Perioperative and Pain Medicine, Department of Molecular*  
6 *and Cellular Physiology, Department of Neurosurgery, Stanford Neurosciences Institute,*  
7 *Stanford University, Palo Alto, CA 94305, USA*

8 *3. New York Stem Cell Foundation – Robertson Investigator, Stanford University, Palo Alto, CA*  
9 *94304, USA*

10 *4. Current address: Department of Pharmacology, University of Michigan, Ann Arbor, MI*  
11 *48109, USA*

12 \*: These authors contributed equally.

13 Correspondence should be addressed to W.T.B. ([wtbird@med.umich.edu](mailto:wtbird@med.umich.edu)) or T.M.  
14 ([mao@ohsu.edu](mailto:mao@ohsu.edu)).

15 Lead Contact: Dr. Tianyi Mao

16 Vollum Institute, Oregon Health & Science University

17 3181 SW Sam Jackson Park Road, L474

18 Portland, Oregon 97239, USA

19 (503) 494-9286 / [mao@ohsu.edu](mailto:mao@ohsu.edu)

20

21 **Abstract**

22 The medial thalamus (MThal), anterior cingulate cortex (ACC) and striatum play important roles  
23 in affective-motivational pain processing and reward learning. Opioids affect both pain and  
24 reward through uncharacterized modulation of this circuitry. This study examined opioid actions  
25 on glutamate transmission between these brain regions in mouse. Mu-opioid receptor (MOR)  
26 agonists potently inhibited MThal inputs without affecting ACC inputs to individual striatal  
27 medium spiny neurons (MSNs). MOR activation also inhibited MThal inputs to the pyramidal  
28 neurons in the ACC. In contrast, delta-opioid receptor (DOR) agonists disinhibited ACC  
29 pyramidal neuron responses to MThal inputs by suppressing local feed-forward GABA signaling  
30 from parvalbumin-positive interneurons. As a result, DOR activation in the ACC facilitated poly-  
31 synaptic (thalamo-cortico-striatal) excitation of MSNs by MThal inputs. These results suggest  
32 that opioid effects on pain and reward may be shaped by the relative selectivity of opioid drugs  
33 to the specific circuit components.

34

35 Keywords: Opioids, thalamus, striatum, anterior cingulate cortex, affective pain, mu opioid  
36 receptor, delta opioid receptor, feed-forward inhibition

37

38 **Introduction**

39 Opioids blunt both sensory-discriminative and affective-motivational dimensions of pain by  
40 modulating neuronal activity in the central and peripheral nervous systems (Oertel et al., 2008;  
41 Zubieta et al. 2001, Corder et al. 2018). The affective-motivational dimension of pain underlies  
42 the aversiveness and negative emotional affect that arise in response to activation of nociceptive  
43 inputs (Gracely 1992; Navratilova & Porreca, 2014; Treede et al., 1999). This study examines  
44 how opioids modulate the circuitry involved in affective-motivational pain perception.

45  
46 In humans, affective pain perception is associated with increased activity in the medial thalamus,  
47 as well as the anterior cingulate cortex (ACC) (Casey et al., 1994; Davis et al., 1997; Peyron et  
48 al., 1999, Peyron et al., 2000). In rodents, chronic pain is associated with hypersensitivity of  
49 mediodorsal thalamic neurons to sensory stimuli (Whitt et al., 2013) and activation of the ACC  
50 has been shown to be aversive using a conditioned place aversion paradigm (Johansen and  
51 Fields, 2004). In contrast, lesions of the ACC decrease affective-motivational pain responses  
52 (Johansen et al., 2001). Anatomically, neurons from the medial thalamus (MThal) send  
53 glutamate afferents to the cortical regions, including the dorsal and ventral ACC, prefrontal  
54 cortex (PFC) and insular cortices (Hunnicuttt at al., 2014), as well as to the dorsomedial striatum  
55 (DMS) (Hunnicuttt at al., 2016). The ACC in turn projects to the DMS, forming a circuit  
56 connecting the medial thalamus and the ACC, both of which provide convergent glutamate  
57 inputs to the DMS. This thalamo-cortico-striatal circuit has been demonstrated to be involved in  
58 pain processing, in particular, affective pain perception (Rainville et al., 1997; Price, 2000,  
59 Fields, 2004; Zhang et al., 2015; Yokota et al., 2016).

60

61 Clinically, opioids are used to reduce pain perception by modulating both sensory-discriminative  
62 and affective-motivational aspects of pain. Mu-opioid receptors (MORs) and delta-opioid  
63 receptors (DORs) are predominantly expressed in the mediodorsal (MD) thalamus and ACC,  
64 respectively (Mansour et al, 1994; Erbs et al. 2015). Injection of opioids into the MD or ACC  
65 can relieve pain and induce conditioned place preference in an animal model of chronic pain  
66 (Carr and Bak, 1988; Guo et al., 2008; Navritalova et al., 2015), suggesting a role for opioid  
67 modulation of thalamic and cortical circuitry in affective pain.

68

69 The striatum is enriched in MORs and DORs, as well as the endogenous opioid ligand  
70 enkephalin (Pert et al., 1976, Koshimizu et al., 2008). Also, opioids have been shown to inhibit  
71 glutamate inputs to the striatum, as well as GABA release from local striatal circuitry (Jiang and  
72 North, 1992; Hoffman and Lupica, 2001; Brundage and Williams, 2002; Miura et al., 2007;  
73 Atwood et al., 2014; Banghart et al., 2015). In this context, the striatum serves as a potentially  
74 critical hub for opioid-dependent modulation of fast synaptic transmission in the affective pain  
75 circuitry (Zubieta et al. 2001).

76

77 The current work determines how and where opioids modulate synaptic transmission between  
78 the thalamic, cortical and striatal regions that are important for the perception of affective pain.  
79 Results revealed opposing roles of the MORs and DORs regarding information flow from the  
80 thalamus to the striatum, whereby MOR activation decreased glutamate transmission in the  
81 striatum, while DOR activation facilitated glutamate transmission via disinhibition of cortical  
82 pyramidal neurons. Thus, MOR activation is predicted to blunt affective pain, while DOR  
83 activation is predicted to facilitate affective pain perception. Together, these data identify

84 specific synaptic connections within the thalamo-cortico-striatal circuit that are modulated by  
85 opioids and illustrate how different opioid subtypes can independently modulate neuronal  
86 communication at the circuit level.

87

## 88 **Results**

### 89 **Opioid receptor agonists suppress excitatory transmission in the dorsomedial striatum**

90 Because the DMS mediates learning and expression of motivated behaviors in response to both  
91 aversive and rewarding stimuli, the opioid sensitivity of glutamate afferents in the DMS was  
92 investigated. In acute mouse brain slice preparations, individual striatal medium spiny neurons  
93 (MSNs) were identified based on physiological properties (Kreitzer, 2009). Whole-cell voltage-  
94 clamp recordings were obtained and glutamate release was evoked using electrical stimulation.  
95 AMPA receptor mediated excitatory postsynaptic currents (EPSCs) were pharmacologically  
96 isolated and recorded (**Figure 1 – figure supplement 1a-c**). Similar to previously published  
97 results in the nucleus accumbens and dorsolateral striatum, application of the mu- and delta-  
98 selective opioid agonist [Met<sup>5</sup>]-enkephalin (ME, 3  $\mu$ M) significantly decreased the amplitude of  
99 the EPSCs. This inhibition was reversed upon washout of ME (**Figure 1 – figure supplement**  
100 **1c**; ME:  $77.8 \pm 4.6\%$  of baseline; washout:  $90.5 \pm 2.6\%$  of baseline; baseline vs ME:  $W(11) = 1$ ,  
101  $p < 0.01$ ) (Jiang and North, 1992; Hoffman and Lupica, 2001; Brundage and Williams, 2002).  
102 The AMPA receptor antagonist NBQX (3  $\mu$ M) eliminated the evoked currents (**Figure 1 –**  
103 **figure supplement 1c**,  $4.0 \pm 2.6\%$  of baseline; baseline vs NBQX:  $W(5) = 0$ ,  $p < 0.05$ ).

104

105 **Mu-opioid receptor agonists suppress thalamic but not cortical glutamatergic inputs to the**  
106 **dorsomedial striatum**

107 Anatomic mapping in mice indicated that glutamate inputs from the medial thalamus and ACC  
108 converged in the DMS (**Figure 1a-b** and **figure 1 – figure supplement 1d-e**) (Hunnicutt et al.,  
109 2016). In addition, MORs and DORs appear to be enriched in the medial thalamus and midline  
110 cortical structures (including the ACC) respectively (Erbs et al. 2015, Wang et al. 2018). To test  
111 whether anatomically distinct expression of MORs and DORs in the thalamus and the cortex  
112 confer specific opioid sensitivity to these two inputs to the striatum, an optogenetic approach was  
113 used to isolate the specific thalamic and cortical inputs onto MSNs in the DMS. Recombinant  
114 adeno-associated viruses (AAVs) encoding two optically-separable channelrhodopsin variants  
115 were injected into the MThal and ACC of three- to five-week-old mice (**Figure 1a**). The blue  
116 light-sensitive channelrhodopsins (CsChR or ChR2(H134R)) were expressed in the MThal while  
117 the red light-sensitive channelrhodopsin (Chrimson) was expressed in the ACC (Klapoetke et al.,  
118 2014). Expression of one channelrhodopsin variant alone demonstrated wavelength-selectivity of  
119 optically-evoked excitatory postsynaptic currents (oEPSCs) in response to brief pulses of either  
120 blue (470 nm) or red (625 nm) light, and minimal cross contamination from undesired light  
121 stimulation was observed under these conditions (**Figure 1 – figure supplement 1d-e**).  
122 Following co-expression of Chrimson in the ACC and either CsChR or ChR2(H134R) in the  
123 MThal, illumination with both blue (470 nm, MThal inputs) and red light (625 nm, ACC inputs)  
124 evoked robust oEPSCs in individual MSNs in the DMS (**Figure 1b**). The MOR-selective agonist  
125 DAMGO inhibited oEPSC amplitude to MThal stimulation (470 nm light) in a reversible  
126 manner, and did not alter oEPSC amplitude to ACC stimulation (**Figure 1c**; DAMGO  $I_{MThal}$ :  
127  $38.2 \pm 6.1\%$  of baseline,  $z = 4.738$ ,  $p < 0.001$ ;  $I_{ACC}$ :  $92.8 \pm 4.9\%$ ,  $z = 0.459$ ,  $p = 0.647$ ). These  
128 observations demonstrated both the optical separation of the thalamic and cortical inputs and the  
129 ability of MOR agonists to selectively inhibit excitatory MThal inputs. Despite the apparent

130 expression of DORs in the midline cortical regions, DOR activation by its selective agonist  
 131 DPDPE did not inhibit the ACC, or MThal inputs (**Figure 1b-d**; DPDPE  $I_{MThal}$ :  $99.6 \pm 5.7$  % of  
 132 baseline,  $z = 0.106$ ,  $p = 0.916$ ;  $I_{ACC}$ :  $95.6 \pm 2.6$  %,  $z = 0.196$ ,  $p = 0.845$ ).

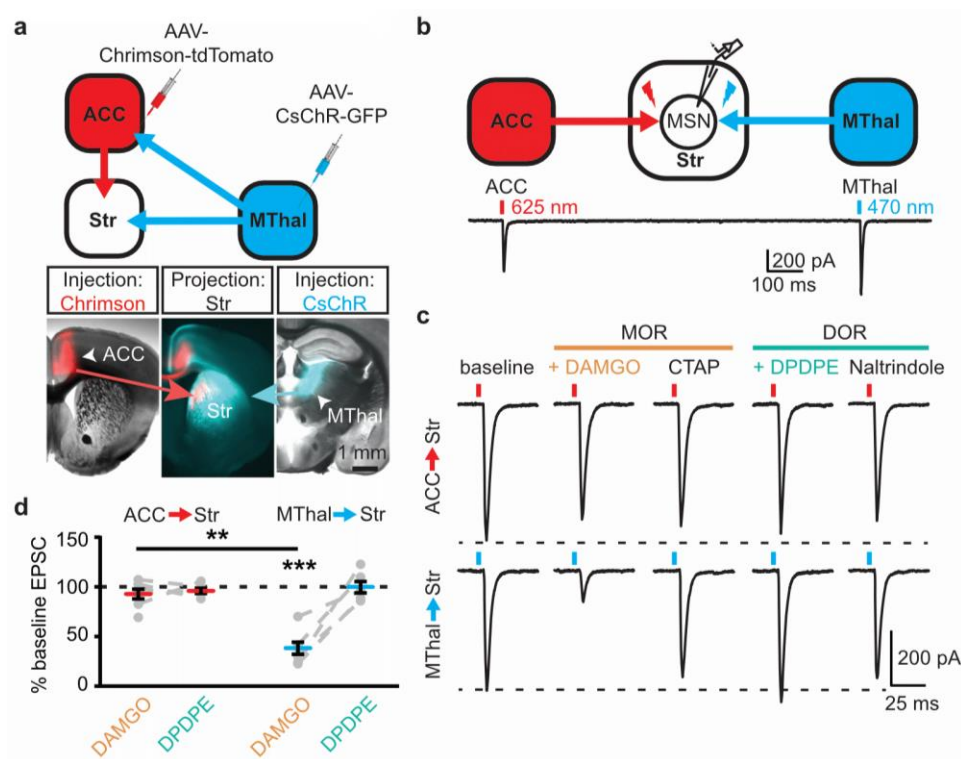

133  
 134 **Figure 1. Mu-opioid agonists suppress thalamic but not cortical inputs to single MSNs in**  
 135 **the striatum**

136 (a) Schematic (upper panel) and an acute mouse brain slice example (lower panel) of viral  
 137 injection design and the axonal projections to the striatum. Overlaid brightfield and  
 138 epifluorescent images showing the injection site of Chrimson (left image, red) in the ACC, and  
 139 CsChR (right image, cyan) in the MThal, and convergent axonal projections from both injections  
 140 to the DMS (center image). (b) Schematic (upper panel) and representative recordings (lower  
 141 panel) for optical excitation. (c) Example oEPSCs of individual MSNs evoked by 625 nm (from  
 142 the ACC, upper traces), and by 470 nm (from the MThal, lower traces) light pulses. The MOR  
 143 (orange label) agonist DAMGO (1  $\mu$ M) was perfused followed by the MOR antagonist CTAP (1

144  $\mu\text{M}$ ). Following CTAP, the DOR (teal label) agonist DPDPE (1  $\mu\text{M}$ ) was perfused followed by  
145 the moderately-selective DOR antagonist naltrindole (0.3  $\mu\text{M}$ ). Red bars: 3 ms of 625 nm light  
146 stimulation; blue bars: 1 ms of 470 nm light stimulation. **(d)** Summary data of dual wavelength  
147 excitation of the ACC and MThal input oEPSCs recorded from single MSNs. Data are plotted as  
148 the percentage of baseline current following exposure to DAMGO or DPDPE for inputs from the  
149 ACC and MThal ( $N = 5$ ,  $n = 8$ , Linear mixed model: 3-way interaction, opioid type ( $\mu$  vs.  $\delta$   
150 opioid)  $\times$  input source (ACC vs. MThal)  $\times$  drug condition (baseline vs. agonist vs. antagonist),  $F$   
151  $(4,8) = 2.938$ ,  $p = 0.091$ ;  $M_{\text{Thal}}_{\text{baseline} \times \text{DAMGO}}$ :  $z = 4.738$ ,  $p < 0.001$ ;  $M_{\text{Thal}}_{\text{baseline} \times \text{DAMGO}}$  vs.  
152  $ACC_{\text{baseline} \times \text{DAMGO}}$ ;  $z = -3.026$ ,  $p < 0.01$ ). Mean  $\pm$  standard error of the mean. Str: striatum.

153 The following figure supplement is available for figure 1:

154 **Figure supplement 1.** Mu-opioid agonists suppress thalamic, but not cortical inputs.

155 **Figure supplement 2.** Single channelrhodopsin injections reproduced specific effect of mu-  
156 opioid-mediated inhibition of thalamic but not cortical inputs.

157  
158 Similar results were obtained when Chrimson and CsChR were injected into the MThal and the  
159 PFC, respectively (**Figure 1 – figure supplement 1f-g**). DAMGO decreased oEPSC amplitude  
160 from the MThal inputs while it had no effect on oEPSCs from the PFC inputs (**Figure 1 – figure**  
161 **supplement 1h-i**; DAMGO  $I_{\text{MThal}}$ :  $22.2 \pm 3.7$  % of baseline,  $z = 3.497$ ,  $p < 0.001$ ;  $I_{\text{PFC}}$ :  $93.9 \pm$   
162  $5.6$  %,  $z = 0.052$ ,  $p = 0.958$ ). DPDPE produced no significant changes in oEPSC amplitude from  
163 either input (DPDPE  $I_{\text{MThal}}$ :  $96.5 \pm 3.9$  % of baseline,  $z = 0.087$ ,  $p = 0.931$ ;  $I_{\text{PFC}}$ :  $81.6 \pm 3.9$  %,  $z =$   
164  $0.672$ ,  $p = 0.502$ ). These results indicate that MThal glutamate inputs onto MSNs were  
165 preferentially inhibited by activation of MORs, while DOR agonists had little to no modulatory  
166 effect on the MThal, ACC, or PFC inputs to the MSNs in the DMS. These findings of mu- and



167 delta-opioid specificity were further confirmed with similar experiments using single  
168 channelrhodopsin variant viral injections into the ACC, PFC, or MThal (**Figure 1 – figure**  
169 **supplement 2**).

170  
171 To ensure that these opioid-sensitive inputs indeed originated from the MThal, *vGluT2-cre* mice  
172 (Vong et al., 2011) were injected with DIO-ChR2(H134R) virus which restricted the expression  
173 of ChR2 only to the thalamus (Wu et al., 2015). Similar to the results from wild-type mice,  
174 activation of MORs by DAMGO, but not DORs by DPDPE, resulted in inhibition of the MThal  
175 inputs to the MSNs (Figure 2;  $I_{\text{DAMGO}}$ :  $18.1 \pm 3.9$  % of baseline,  $W(6) = 0$ ,  $p < 0.05$ ;  $I_{\text{DPDPE}}$ :  
176  $100.5 \pm 7.9$  %,  $W(5) = 7$ ,  $p = 1$ ). Furthermore, MOR agonists also inhibited inputs from the  
177 anterior medial thalamus, suggesting the general effects of opioid inhibition of thalamic inputs to  
178 the DSM (**Figure 1 – figure supplement 2**).

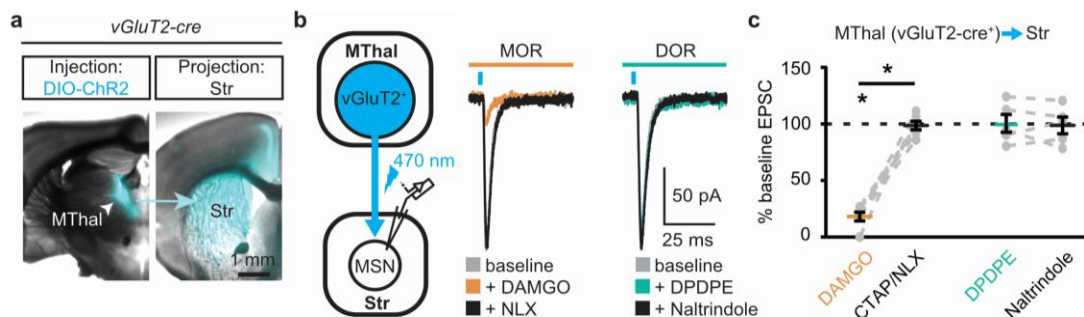

179  
180 **Figure 2. Mu-opioid agonists selectively suppress thalamic inputs from vGluT2-positive**  
181 **thalamic neurons**

182 (a) Example overlaid brightfield and epifluorescent images showing Cre-dependent expression  
183 of ChR2(H134R)-EYFP (cyan) in the MThal (left panel) and axonal projections into the DMS  
184 (right panel) following injection of AAV2-DIO-ChR2(H134R)-EYFP in the MThal of *vGluT2-*  
185 *Cre* mice. (b) Experimental schematic showing optical stimulation of glutamate inputs in the

186 DMS (left panel). Representative traces of oEPSCs showing effects of MOR agonist DAMGO (1  
187  $\mu\text{M}$ , middle panel, orange) and antagonist naloxone (NLX, 1  $\mu\text{M}$ , middle panel, black), and the  
188 DOR agonist DPDPE (1  $\mu\text{M}$ , right panel, teal) and DOR antagonist naltrindole (0.3  $\mu\text{M}$ , right  
189 panel, black). (c) Summary data of oEPSCs showing effects of MOR agonist DAMGO and  
190 antagonist CTAP or NLX (1  $\mu\text{M}$ ), and the DOR agonist DPDPE and DOR antagonist  
191 naltrindole. DAMGO/(CTAP/NLX):  $N = 3$ ,  $n = 6$ ,  $SM = 9.33$ ,  $p < 0.01$ ; DPDPE/naltrindole,  $N =$   
192  $3$ ,  $n = 5$ ,  $SM = 0$ ,  $p = 1.0$ . Skillings-Mack test followed by paired Wilcoxon signed-ranks test  
193 *post-hoc* analysis. Mean  $\pm$  standard error of the mean. \*  $p \leq 0.05$ ; *SM*: Skillings-Mack statistic;  
194 Str: striatum.

195

### 196 **Thalamostriatal and thalamocortical projections can arise from the same medial thalamic** 197 **neuronal population**

198 Single neuron tracing in the rat has demonstrated that medial thalamic neurons can send  
199 collaterals to both the cortex and striatum (Otake and Nakamura, 1998; Kuramoto et al., 2017).  
200 To determine whether the opioid-sensitive population of thalamic neurons in mouse project to  
201 both the ACC and DMS, two approaches were used. First, red and green fluorescent retrograde  
202 transported beads (retrobeads) were injected into the ACC and DMS, respectively (**Figure 3 –**  
203 **figure supplement 1b**). The injection sites were then localized based on the mouse brain atlas  
204 (Franklin & Paxinos, 2001, **Figure 3 – figure supplement 1b-c**). Retrogradely labeled somas  
205 were found in the lateral MD and the central lateral (CL) thalamus (**Figure 3 – figure**  
206 **supplement 1c-g**). In brain sections containing the MD thalamus (selected figures 44, 45, and 46  
207 of the Franklin & Paxinos atlas, second edition; **Figure 3 – figure supplement 1d**), there was a  
208 substantial fraction of neurons that projected to the DMS that also contained retrograde beads

209 originating from the ACC ( $21 \pm 4\%$  of striatal-projecting neurons colocalized with ACC-  
210 projecting neurons). Second, to further determine whether cortical-projecting thalamic neurons  
211 send collateral axons to the striatum, a retrogradely transported virus, AAV2-retro (Tervo et al.,  
212 2016), encoding Cre-recombinase was injected into the ACC, along with AAV2-GFP which  
213 served to indicate the injection site of AAV2-retro-Cre virus and to visualize corticostriatal  
214 axons (Madisen et al., 2015, Tervo et al., 2016). In the same mice, Cre-dependent AAV2-FLEX-  
215 TdTomato virus was injected into the MThal (**Figure 3a-d**). TdTomato would be expected to be  
216 expressed only in the thalamic neurons projecting to the ACC area that were also infected by  
217 AAV2-retro-Cre virus. Indeed, TdTomato-positive neurons were found in the MThal (**Figure**  
218 **3b**). GFP expression in the ACC indicated the AAV2-retro virus injection site (**Figure 3c**), and  
219 TdTomato-expressing axon terminals, originating from thalamic neurons, were also visible in the  
220 ACC (**Figure 3c**). Prominent GFP-expressing axons originating from the ACC and TdTomato-  
221 expressing axon collaterals originating from the MThal were observed in the DMS (**Figure 3d**).  
222 These results indicate that at least a significant fraction of thalamic neurons project to both the  
223 ACC and DMS, and further, ACC-striatal and MThal-striatal projections can innervate  
224 anatomically overlapping areas in the DMS (Hunnicuttt et al. 2016).

225  
226 To confirm that the apparent axon collaterals in the DMS form functional synapses rather than  
227 passing through the DMS en route to the ACC, AAV2-retro-Cre was injected into the ACC and a  
228 Cre-dependent ChR2-expressing virus AAV2-DIO-ChR2(H134R)-EYFP was injected into the  
229 MThal, conferring the ability to optogenetically activate potential striatal axons originating from  
230 ACC-projecting MThal neurons (**Figure 3e**). Optical illumination evoked glutamate-mediated  
231 oEPSCs in striatal MSNs that were potently inhibited by ME (**Figure 3f**;  $I_{ME}$ :  $22.4 \pm 6.6\%$  of

232 baseline,  $N = 3$ ,  $n = 5$ , paired t-test,  $p < 0.01$ ). Thus, a portion of the opioid-sensitive thalamic  
233 neuronal population projected to both the DMS and ACC.

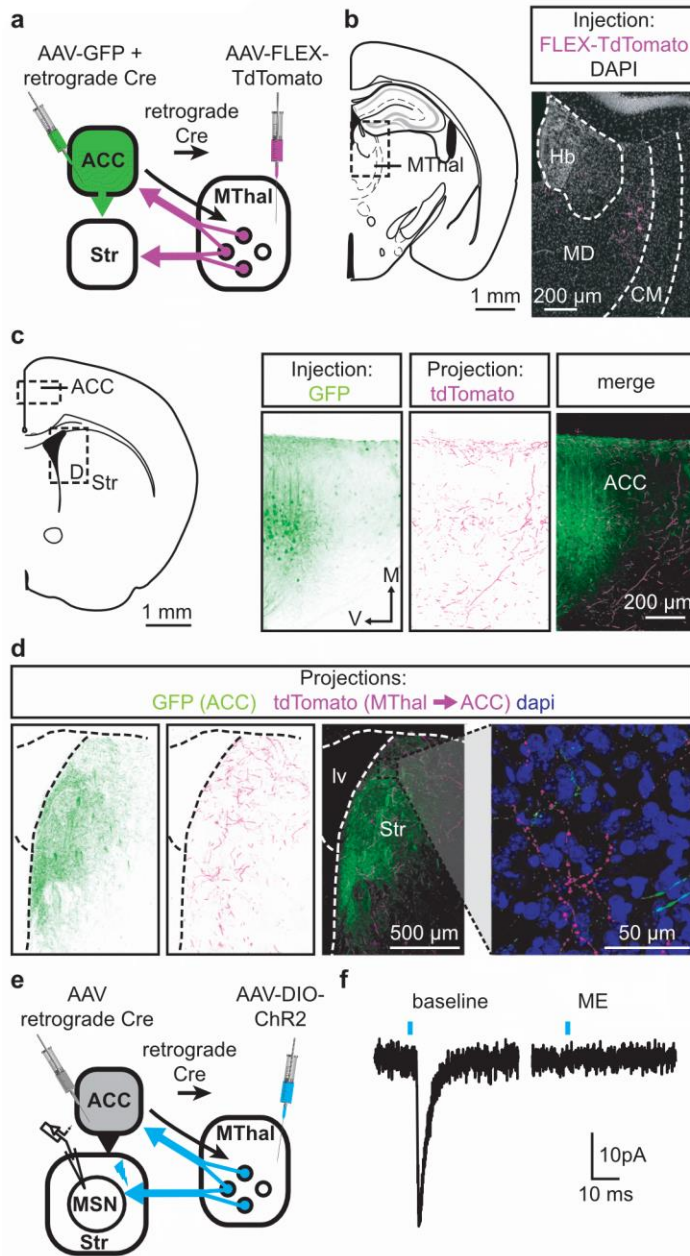

234  
235 **Figure 3. Individual mediadorsal thalamic neurons project to both the DMS and ACC**  
236 (a) Schematic of the AAVretro-Cre and Cre-dependent AAV2-DIO-TdTomato injections. (b)  
237 Fluorescent image of cell bodies expressing TdTomato following injections shown in (a) in the  
238 MThal (magenta, right panel), with corresponding mouse brain atlas section (left panel). (c)

239 Representative mouse brain atlas section showing approximate origin of images taken from ACC  
240 (left panels) and DMS as shown in **(d)**. Images of the ACC showing AAV-GFP injection site and  
241 axons from the MThal (magenta). **(d)** Images of the DMS showing overlapping axons from both  
242 the ACC (green) and MThal (magenta). Rightmost panel shows high magnification image taken  
243 at the black box demarcation in the left panel. Cell nuclei are stained with DAPI (blue). **(e)**  
244 Schematic of retrograde AAV-retro-Cre and Cre-dependent AAV2-DIO-ChR2(H134R)-EYFP  
245 injections, and recordings of MSNs in the DMS. **(f)** An example trace of oEPSCs of a MSN in  
246 the DMS from a mouse injected as shown in **(e)**. ME: opioid agonist [Met<sup>5</sup>]-Enkephalin. Blue  
247 bars: 470 nm light stimulation. V: ventral; M: midline; Hb: habenula; CM: centromedial  
248 thalamus; MD: mediodorsal thalamus; Str: striatum; lv: lateral ventricle. Mouse brain atlas  
249 sections from Franklin & Paxinos 2001.

250 The following figure supplement is available for figure 3:

251 **Figure supplement 1.** A subset of mediodorsal thalamic neurons send collaterals to both the  
252 ACC and DMS.

253

254 **Mu-opioid agonists suppress excitatory thalamic inputs to the ACC, while delta-opioid**  
255 **agonists suppress feedforward inhibition**

256 Since the excitatory MThal inputs to the DMS were strongly inhibited by MOR activation and at  
257 least a fraction of those thalamic neurons project to both the ACC and DMS, we hypothesized  
258 that the excitatory MThal inputs to the ACC would be inhibited by MORs. Inputs from the MD  
259 thalamus have been reported to synapse directly onto layer 2/3 (L2/3) and 5 (L5) pyramidal  
260 neurons, and also to trigger GABA release onto pyramidal neurons via innervation of L2/3 and  
261 L5 parvalbumin-positive (PV) interneurons in the ACC (Delevich et al., 2015). Both optically

262 evoked oEPSCs and feed-forward inhibitory postsynaptic currents (oIPSCs) were measured in  
263 L2/3 and L5 pyramidal neurons of the ACC (**Figure 4** and **figure 4 – figure supplement 1**; also  
264 see **Materials and Methods**). Similar to the results from recordings of the MSNs in the DMS,  
265 oEPSCs of the L2/3 and L5 pyramidal neurons in the ACC from the MThal inputs were potently  
266 inhibited by the MOR agonist DAMGO but unaffected by the DOR agonist DPDPE, suggesting  
267 expression of MORs but not DORs on thalamic glutamate terminals in the ACC (**Figure 4b-c**,  
268 and **figure 4 – figure supplement 1b-c**;  $I_{\text{DAMGO}}$ :  $54.0 \pm 5.0$  % of baseline,  $W(17) = 1$ ,  $p < 0.001$ ;  
269  $I_{\text{DPDPE}}$ :  $93.4 \pm 7.0$  %,  $W(14) = 36$ ,  $p = 0.312$ ; L2/3;  $I_{\text{DAMGO}}$ :  $69.3 \pm 3.3$  % of baseline,  $W(15) = 0$ ,  
270  $p < 0.001$ ;  $I_{\text{DPDPE}}$ :  $92.9 \pm 5.4$  %,  $W(9) = 9$ ,  $p = 0.129$ ). These oEPSCs were of thalamic origin  
271 since track injection of ChR2 dorsal to the thalamus resulted in only sporadic and insignificant  
272 oEPSCs in the ACC (**Figure 4 – figure supplement 2**).

273  
274 Surprisingly, both DAMGO and DPDPE potently inhibited GABA-mediated oIPSCs from the  
275 MThal to the ACC pyramidal neurons (**Figure 4e-f** and **figure 4 – figure supplement 1e-f**;  
276  $I_{\text{DAMGO}}$ ,  $37.9 \pm 7.8$  % of baseline,  $W(14) = 0$ ,  $p < 0.001$ ;  $I_{\text{DPDPE}}$ ,  $47.6 \pm 7.9$  %,  $W(11) = 1$ ,  $p <$   
277  $0.01$ ;  $I_{\text{DAMGO}}$ ,  $61.2 \pm 9.5$  % of baseline,  $W(12) = 1$ ,  $p < 0.001$ ;  $I_{\text{DPDPE}}$ ,  $62.7 \pm 5.4$  %,  $W(10) = 0$ ,  $p$   
278  $< 0.01$ ). Since PV-positive neurons reportedly contribute to feed-forward inhibition of MThal  
279 inputs to L5 pyramidal neurons in the ACC (Delevich et al., 2015), opioid modulation of oIPSCs  
280 of PV neurons onto L5 pyramidal neurons in the ACC was measured. *PV-cre<sup>+/+</sup>;Ai32<sup>+/+</sup>* mice  
281 (Madisen et al., 2015, Hippenmeyer et al., 2005) were used to express ChR2(H134R) in PV  
282 neurons, and oIPSCs were recorded from L5 pyramidal neurons (**Figure 5a**). The oIPSCs were  
283 potently inhibited by DPDPE but not DAMGO (**Figure 5b-c**;  $I_{\text{DAMGO}}$ :  $104.1 \pm 6.1$  % of baseline,

284  $W(11) = 25, p = 0.998; I_{DPDPE}: 44.9 \pm 5.7 \%, W(15) = 0, p < 0.001$ ), suggesting that DORs were  
285 expressed on PV neurons in the ACC.

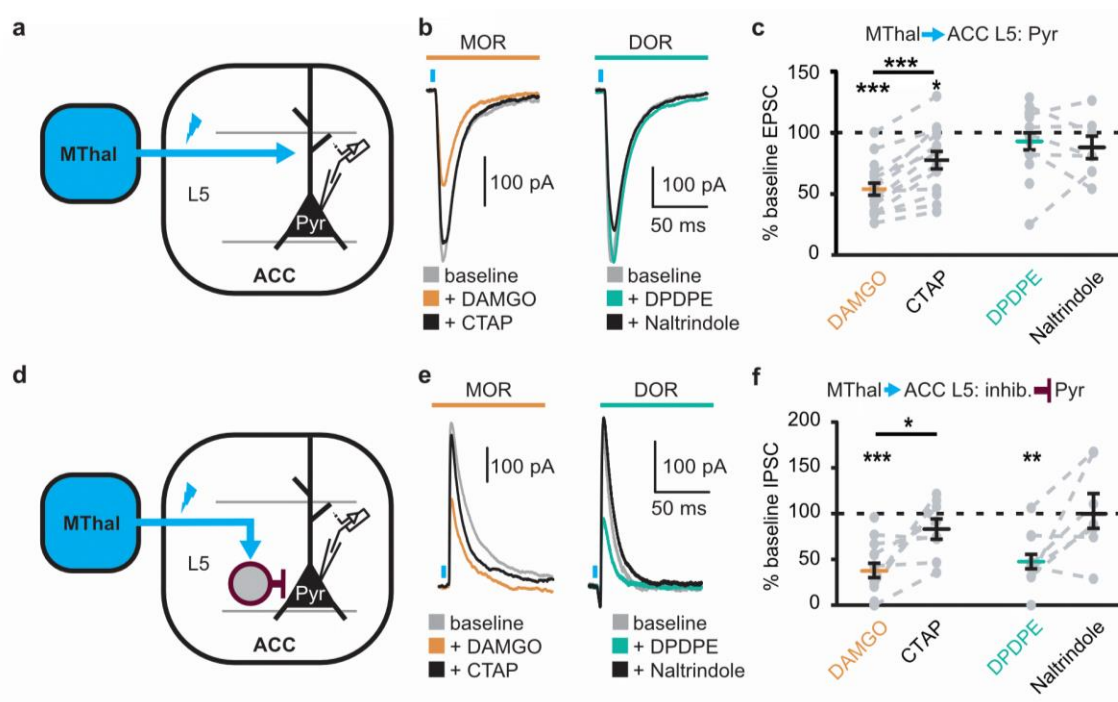

286  
287 **Figure 4. Mu-opioid agonists suppress thalamic inputs to pyramidal neurons in the ACC**  
288 **while delta-opioid agonists suppress cortical feed-forward inhibition in the ACC**  
289 (a-c) oEPSCs of the pyramidal neurons in the ACC elicited by optical stimulation of MThal  
290 input. (A) Schematic of ChR2 injection, MThal optical stimulation, and recording of oEPSCs of  
291 the layer 5 (L5) pyramidal neurons (Pyr) in the ACC. Blue: ChR2 expression and optical  
292 stimulation. (b) Example traces of oEPSCs elicited from optical stimulation of the MThal  
293 terminals in the ACC during baseline (gray), application of DAMGO (1 $\mu$ M, left panel, orange),  
294 followed by CTAP (1  $\mu$ M, left panel, black), or application of DPDPE (1 $\mu$ M, right panel, teal,)  
295 followed by naltrindole (0.3  $\mu$ M, right panel, black). Blue bars: 1 ms of 470 light stimulation. (c)  
296 Summary data of oEPSCs of all recording as shown in (b) with responses plotted as a percent of  
297 the baseline. DAMGO:  $N = 13, n = 17; SM = 22.85, p < 0.001$ ; DPDPE:

298 N = 11, n = 15; naltrindole: N = 5, n = 7,  $SM = 0.989$ ,  $p = 0.610$ . **(d-f)** oIPSCs of the pyramidal  
299 neurons from the MThal optical stimulation, via inhibition through interneurons in the ACC. **(d)**  
300 Schematic of ChR2 injection, MThal optical stimulation, and recording of the pyramidal neurons  
301 in the ACC via feed-forward inhibition. Blue: ChR2 expression and optical stimulation;  
302 magenta: outline of an interneuron. **(e)** Example traces of oIPSCs elicited from optical  
303 stimulation of the MThal terminals in the ACC during baseline (gray), application of DAMGO  
304 (1  $\mu$ M, left panel, orange) followed by CTAP (1  $\mu$ M, left panel, black), or application of DPDPE  
305 (1  $\mu$ M, right panel, teal) followed by naltrindole (0.3  $\mu$ M, right panel, black). **(f)** Summary data  
306 of oIPSCs for all recordings as in (B) with responses plotted as a percent of the baseline.  
307 DAMGO: N = 9, n = 14; CTAP, N = 7, n = 8,  $SM = 15.68$ ,  $p < 0.001$ ; DPDPE: N = 6, n = 12;  
308 naltrindole: N = 5, n = 7,  $SM = 7.426$ ,  $p < 0.05$ . Skillings-Mack test followed by paired Wilcoxon  
309 signed-ranks test *post-hoc* analysis. \*  $p \leq 0.05$ ; \*\*  $p \leq 0.01$ ; \*\*\*  $p \leq 0.001$ . Mean  $\pm$  standard  
310 error of the mean. *SM*: Skillings-Mack statistic; Blue bars: 1 ms of 470 nm light stimulation.

311 The following figure supplement is available for figure 4:

312 **Figure supplement 1.** Opioid inhibition of synaptic currents onto layer 2/3 pyramidal neurons in  
313 the ACC.

314 **Figure supplement 2.** Verification of origins of optically-evoked response.

315  
316 Colocalization of DORs and parvalbumin was investigated at the protein and mRNA levels  
317 **(Figure 5d-f)**. Images of fluorescent RNA probes for endogenous DORs (*Oprd1*) and  
318 parvalbumin (*Pvalb*) revealed that the majority of *Pvalb*-positive cells were also *Oprd1*-positive  
319 **(Figure 5d, f;  $88.7 \pm 1.4\%$  of *Pvalb*-positive cells expressed detectable levels of *Oprd1*)**. A  
320 knockin mouse line expressing GFP-fused DORs (Scherrer et al., 2006) was used to probe for



321 the presence of DOR proteins in sections stained for parvalbumin proteins. Similarly,  $95.0 \pm$   
 322 1.2% of parvalbumin protein-positive neurons expressed detectable levels of GFP (**Figure 5e-f**).  
 323 Together, these data indicate that DORs are expressed on PV neurons, consistent with their role  
 324 in inhibition of GABA release onto pyramidal neurons.

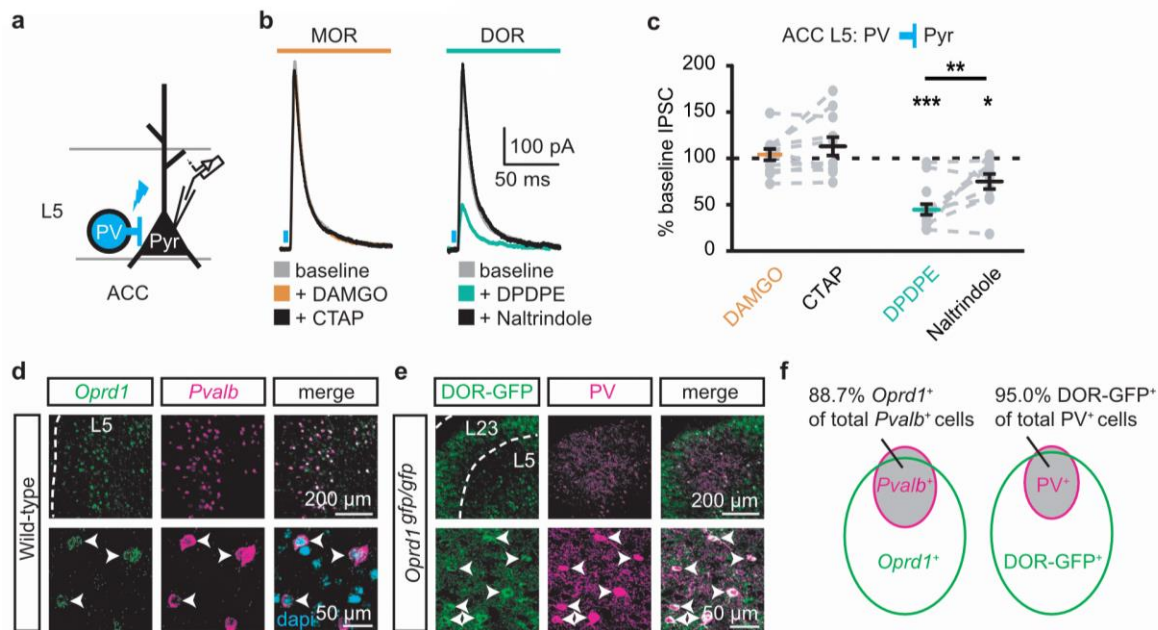

325 **Figure 5. DORs expressed on PV-positive interneurons suppress oIPSCs onto layer 5**  
 326 **pyramidal neurons**

328 (a) Schematic of ChR2 expression and recording of oIPSCs of parvalbumin-positive  
 329 interneurons (PV) to layer 5 (L5) pyramidal neurons (Pyr) in the ACC of *PV-cre*<sup>+/+</sup>;*Ai32*<sup>+/+</sup> mice.  
 330 Blue: ChR2 expression and optical stimulation. (b) Example traces of oIPSCs during baseline  
 331 (gray), application of DAMGO (1  $\mu$ M, left panel, orange) and followed by CTAP (1  $\mu$ M, left  
 332 panel, black), or application of DPDPE (1  $\mu$ M, right panel, teal) followed by naltrindole (0.3  $\mu$ M,  
 333 right panel, black). (c) Summary data of PV interneurons to pyramidal neuron oIPSCs for all  
 334 recording as in (b). Responses plotted as a percent of the baseline. DAMGO/ CTAP: N = 5, n =  
 335 11, *SM* = 0.005, *p* = 0.998; DPDPE: N = 8, n = 15; naltrindole: N = 5, n = 10, *SM* = 19.60, *p* <  
 336 0.001. (d) *In-situ* hybridization in wild-type mouse brain sections containing the ACC stained

337 with probes against mRNA coding for DOR (*Oprd1*, left panel, green) and parvalbumin (*Pvalb*,  
338 middle panel, magenta) and overlaid with DAPI (right panel, cyan). (e) Immunohistochemistry  
339 on the mouse ACC from a *DOR-GFP* knockin mouse and stained with anti-GFP antibodies (left  
340 panel, green), and anti-parvalbumin antibodies (middle panel, magenta), and overlaid (right  
341 panel). (f) Venn diagram quantifying overlap of *Oprd1*-positive and *Pvalb*-positive (left panel, N  
342 = 2, n = 8), and DOR-GFP-positive and PV-positive cells in the mouse ACC (right panel, N = 2,  
343 n = 15). Skillings-Mack test followed by paired Wilcoxon signed-ranks test *post-hoc* analysis. \*,  
344  $p < 0.05$ ; \*\*,  $p < 0.01$ ; \*\*\*  $p < 0.001$ . Mean  $\pm$  standard error of the mean. SM: Skillings-Mack  
345 statistic.

346

#### 347 **Delta-opioid agonists increase cortical excitability**

348 As DOR agonists selectively reduced feed-forward inhibition of the local PV neurons to  
349 pyramidal neurons in the ACC, activation of DORs was predicted to disinhibit ACC pyramidal  
350 neurons resulting in increased cortical excitability. Optical excitation of MThal terminals in the  
351 ACC evoked action potential (AP) firing in ACC L5 pyramidal neurons measured using a cell-  
352 attached recording configuration (**Figure 6a-c**). When APs were elicited in approximately 50%  
353 of the trials, activation of MORs by DAMGO decreased the fraction of trials that evoked action  
354 potentials ( $0.4 \pm 0.1$  fold change relative to baseline, paired t-test,  $p < 0.01$ ), while activation of  
355 DORs by DPDPE led to a significant increase in AP firing probability ( $5 \pm 3.1$  fold change  
356 relative to baseline, paired t-test,  $p < 0.05$ ). This was consistent with an inhibitory effect of MOR  
357 activation and a disinhibitory effect of DOR activation on pyramidal neuron firing rates (**Figure**  
358 **6b-c**) with no significant effect on action potential latency (**Figure 6 – figure supplement 1**).

359 Thus, DOR activation in the ACC resulted in disinhibition of the pyramidal neurons within the  
360 ACC, which led to increased cortical excitability.

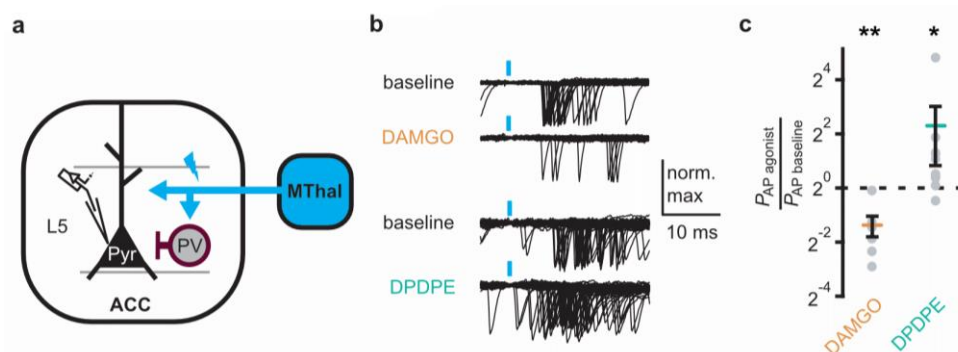

361  
362 **Figure 6. DOR activation results in increased cortical excitability**  
363 (a) Schematic of ChR2 expression and recording of optically-evoked action potentials (APs)  
364 using a loose cell-attached recording configuration. Blue: ChR2 expression and optical  
365 stimulation; magenta: outline of a parvalbumin -positive interneuron (PV). (b) Example traces of  
366 50 trials from a single layer 5 (L5) pyramidal neuron (Pyr) in which APs were evoked by optical  
367 stimulation (blue bars) under baseline conditions, or in the presence of DAMGO (1  $\mu$ M, orange),  
368 or DPDPE (1  $\mu$ M, teal). (c) Summary data plotted on a log2 scale for action potential firing  
369 probability ( $P_{AP}$ ) in the presence of drugs ( $P_{AP \text{ agonist}}$ ) relative to baseline ( $P_{AP \text{ baseline}}$ ). Paired t-test;  
370 \*  $p \leq 0.05$ ; \*\*  $p \leq 0.01$ . DAMGO: N = 3, n = 7; DPDPE: N = 5, n = 8.

371 The following figure supplement is available for figure 6:

372 **Figure supplement 1. Latencies of thalamocortical-evoked action potentials in ACC pyramidal**  
373 **neurons.**

374

375 **Delta-opioid agonists facilitated thalamo-cortico-striatal signaling**

376 The increased excitability upon DOR activation in L5 pyramidal neurons in the ACC was  
377 hypothesized to propagate to MSNs in the DMS via corticostriatal projections and result in

378 increased glutamate release in the striatum. To test this hypothesis, ChR2(H134R) was injected  
379 into the MThal. Brain slices containing both the ACC and DMS were prepared (**Figure 7a**).  
380 Simultaneous recordings were made from L5 pyramidal neurons in the ACC (voltage recording)  
381 and MSNs in the DMS (current recording). Laser illumination was used to focally excite axons  
382 within the ACC or the DMS. When the ACC was illuminated, optogenetically stimulated MThal  
383 axons triggered action potentials in the L5 pyramidal neurons in the ACC, which then  
384 propagated to the DMS, and in turn, triggered a poly-synaptic oEPSCs in the MSNs (**Figure 7a**).  
385 In contrast, focal illumination in the DMS resulted in a short latency oEPSC in the MSNs in the  
386 DMS with no measurable responses in the L5 pyramidal neurons in the ACC. These results  
387 indicated that MThal-ACC-DMS circuits were preserved in this slice preparation. Long-latency  
388 poly-synaptic oEPSCs were also confirmed in MSNs in the DMS following widefield optical  
389 stimulation of the ACC (**Figure 7b** and **figure 7 – figure supplement 1a**). Application of  
390 DPDPE increased the charge transfer of the poly-synaptic MThal→ACC→DMS oEPSCs  
391 (**Figure 7b-c**;  $Q_{\text{baseline}}: 129.4 \pm 46.2 \text{ fC}$ ;  $Q_{\text{DPDPE}}: 344.7 \pm 90.5 \text{ fC}$ ,  $W(7) = 2$ ,  $p < 0.05$ ).  
392 Amplitude changes of the poly-synaptic oEPSC in response to DPDPE, however did not reach  
393 statistical significance (**Figure 7 – figure supplement 1b**;  $I_{\text{DPDPE}}: 196.1 \pm 41.0 \%$ ,  $W(7) = 3$ ,  $p =$   
394  $0.145$ ). Taken together, the results indicate the presence of both MORs and DORs in the  
395 thalamo-cortico-striatal circuitry, where DORs primarily facilitated information flow in the  
396 indirect pathway from the MThal via the ACC to the DMS, while MORs suppressed information  
397 flow from the MThal directly to the DMS.

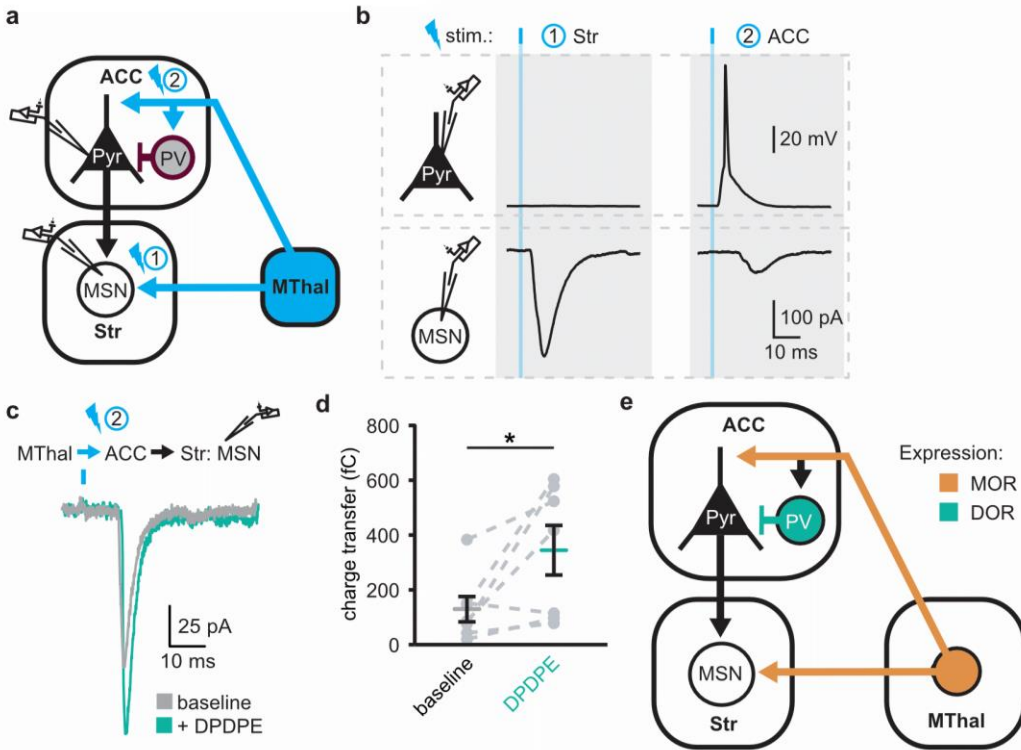

398

399 **Figure 7. DOR activation disinhibits thalamo-cortico-striatal circuits.**

400 (a) Schematic of ChR2 expression and dual recordings in layer 5 (L5) pyramidal neurons (Pyr)

401 in the ACC and MSNs in the DMS. Blue: ChR2 expression and optical stimulation; magenta:

402 outline of a parvalbumin-positive interneuron (PV). 470nm light stimulation locations are shown

403 as 1 and 2. (b) Example traces of current-clamp recording from a L5 pyramidal neuron in the

404 ACC (upper panels), and voltage-clamp recording from a MSN in the DMS (lower panels) in

405 response to light stimulations at location 1 (Str) and location 2 (ACC). (c) Example traces of

406 poly-synaptic current evoked by optical stimulation of MThal terminals in the ACC (location 2)

407 while recording from an MSN in the DMS during baseline (gray), and in presence of DPDPE (1

408  $\mu\text{m}$ , teal). (d) Summary data of the charge transfer of poly-synaptic oEPSCs in the MSNs evoked

409 by optical stimulation of location 2 in the ACC. Paired Wilcoxon signed-ranks test. \*  $p \leq 0.05$ ;

410 Gray: baseline; teal: DPDPE. (e) Summary schematic depicting a part of the affective and

411 motivational pain circuit consisting of the MThal, ACC and DMS. Str: striatum.

412 The following figure supplement is available for figure 7:

413 **Figure supplement 1.** EPSCs and action potential latencies within the thalamo-cortico-striatal  
414 circuits.

415

## 416 **Discussion**

417 Despite the importance of the thalamo-cortico-striatal loop in affective pain and reward, the  
418 exact circuit mechanisms and how they are modulated by opioids are not fully understood.

419 Previously, we described the mesoscopic anatomical connectivity between subregions within the  
420 thalamus and cortex, and the convergence of their axonal projections within the striatum

421 (Hunnicutt Elife 2016). Here, guided by such information, we used both anatomical and

422 functional approaches to demonstrate the connectivity of the MThal, ACC and DMS. We found

423 that projections from the MThal and ACC converged in the DMS, rather than the ventral striatum

424 which has been well studied for reward and drug addiction. Further, we found different opioid

425 receptors differentially affect projection-specific synapses (**Figure 7e**). Specifically, activation of

426 MORs suppressed both MThal-ACC and MThal-DMS excitatory synapses, however, activation

427 of DORs enhanced the excitatory input from the MThal to the pyramidal neurons in the ACC by

428 disinhibiting local feed-forward inhibition mediated by PV interneurons in the ACC. This DOR-

429 mediated disinhibition of MThal-ACC synapses has functional significance at the network level

430 in that it facilitates information to flow from the MThal to the DMS via the ACC. Our results

431 suggests that opioid effects on pain and reward are shaped by the relative selectivity of opioid

432 drugs to the specific circuit components.

433

434 **Convergence of thalamic and cortical inputs to the striatum**

435 Glutamate afferents from the midline cortical structures and medial thalamus converge to the  
436 DMS in the affective pain pathway. Here, we demonstrated that single MSNs in the DMS can  
437 receive inputs from both the midline cortex and medial thalamus. These results establish the  
438 anatomical basis for investigating convergence and integration within this circuit. Being able to  
439 detect convergence of MThal and ACC inputs at the level of the individual cell also paves the  
440 way for future studies of this circuit with single cell resolution at the population level.

441

#### 442 **Individual MThal neurons projects to both the ACC and DMS**

443 Consistent with studies demonstrating cortical and striatal projections for midline thalamic  
444 neurons in rats (Otake and Nakamura, 1998; Kuramoto et al., 2017), the simultaneous retrograde  
445 bead injections localized to the rostromedial ACC and DMS demonstrated double-labeling of  
446 individual neurons in the lateral MD and CL thalamus, suggesting that single thalamic neurons  
447 can project to both the cortex and striatum. It should be acknowledged that the exact location of  
448 the retrograde bead labeled neurons relative to defined borders of the thalamic nuclei is not  
449 perfectly accurate since a small range of slices containing the MThal were fit to a single plane of  
450 the mouse atlas (Franklin & Paxinos, 2001) without correcting for irregularities such as brain  
451 slice angles. Furthermore, the diffusion of retrograde beads in brain tissue is limited such that  
452 each injection is relatively small and localized, thus, the number of colocalized neurons is not an  
453 absolute measure of the fraction of MD neurons projecting to both the ACC and DMS. Despite  
454 these constraints, the retrograde bead injections and retrograde viral labeling experiments both  
455 suggested the presence of a population of neurons in the MThal that project to both the ACC and  
456 DMS. We also confirmed that these collaterals originating from the MThal made functional en  
457 passant synapses in the DMS. Based on these tracing experiments and convergence of the

458 cortical and thalamic inputs to the striatum experiments mentioned above, a circuit with a direct  
459 monosynaptic arm from the MThal to the DMS, and an indirect poly-synaptic arm from the  
460 MThal via ACC to the DMS is described.

461

#### 462 **Opioid modulation of the thalamo-cortico-striatal circuitry**

463 The MOR agonist DAMGO had a strong inhibitory effect on the MThal inputs to the DMS,  
464 whereas neither DAMGO nor the DOR agonist DPDPE had a significant effect on the ACC  
465 inputs to the DMS. These results indicate that the midline thalamostriatal pathway stands as a  
466 major source of opioid-regulated glutamate inputs to the DMS, and that MOR agonists alter the  
467 relative influence of cortical and thalamic inputs on DMS excitability. The MThal inputs to the  
468 ACC were also inhibited by MOR agonists. Given the extensive MOR-sensitive axonal  
469 projections from the MThal to the ACC, it is possible that the analgesic and rewarding effect of  
470 morphine injection into the ACC is due in part to inhibition of thalamic glutamate inputs to the  
471 ACC (Navratilova et al., 2015). Together, MOR activation may selectively suppress information  
472 from MThal to the striatum either directly or indirectly, but may leave intact other information  
473 that is also going through the ACC to the striatum. This may contribute to the selective analgesic  
474 and rewarding effect of morphine without affecting other cognitive functions.

475

#### 476 **Opposing effects of opioid subtypes on circuitry modulation**

477 Although all opioid receptors couple to the inhibitory  $G_i$  pathway, their effect on the circuit can  
478 be distinct. In this study, the lack of strong inhibition of DORs on glutamate transmission in the  
479 corticostriatal projections together with the potent DOR inhibition of GABA release from PV  
480 interneurons to pyramidal neurons in the ACC allows for DORs to function in a disinhibitory



481 manner. DOR activation effectively leads to hyper-excitability ACC circuits, while MOR  
482 activation functions in an inhibitory manner, dampening glutamate release in the thalamo-  
483 cortico-striatal circuit. These results complement a previous study in which DOR activation  
484 resulted in increased activity in the rat insular cortex following dental pulp stimulation, while  
485 MOR activation decreased the insular cortex activity (Yokota, et al., 2016a). A follow-up study  
486 found that inhibitory transmission from fast-spiking interneurons to pyramidal neurons was  
487 inhibited by DOR activation (Yokota, et al., 2016b). The current results extend these findings to  
488 the mouse ACC and identify that specifically, PV interneurons are a target of DOR inhibition.

489  
490 While PV interneurons have been suggested to selectively mediate feed-forward inhibition of  
491 thalamocortical transmission in the ACC, it is important to note that the current findings do not  
492 rule out potential influence of opioids on other interneuron populations. In fact,  
493 immunohistochemical and *in situ* hybridization data presented here suggest that DOR expression  
494 is not restricted to PV interneurons, as only approximately 20% of DOR-positive neurons were  
495 parvalbumin-positive (**Figure 4e**). Furthermore, certain neurons in the ACC have been shown to  
496 express MORs (Tanaka and North, 1994, Vogt et al., 1995, Wang et al., 2018), suggesting that  
497 there are additional opioid-sensitive neurons within the local ACC circuits.

498  
499 It has recently been shown that MOR agonists can modestly inhibit insular-striatal glutamate  
500 transmission (Munoz et al., 2018). In this study ACC-striatal transmission was relatively  
501 insensitive to MOR and DOR agonists, while PFC-striatal transmission appeared marginally  
502 sensitive to the DOR agonist DPDPE. Thus, there may be heterogeneity in the opioid sensitivity  
503 of cortical projections to the striatum. The current results also suggest that MORs and DORs are

504 positioned to serve opposing functions in regulating affective pain circuitry and reward and  
505 motivated behaviors.

506

507 The MD, ACC, and striatum have been demonstrated to play roles in pain- and reward-related  
508 behaviors (Kawagoe et al., 2007; LaLumiere and Kalivas, 2008; Le Merrer et al., 2009; Harte et  
509 al., 2011; Navratilova et al., 2012). Therefore, some aspects of the analgesic and  
510 rewarding/addictive effects of opioids may arise from modulation within the poly-synaptic  
511 circuits between the MThal, ACC and striatum described here. Increased ACC activity is  
512 associated with increased affective pain intensity and decreased ACC activity is associated with  
513 analgesia (Johansen and Fields, 2004). The current results suggest that drugs acting in the ACC  
514 at either MOR or DOR have the potential to modulate this circuitry. These data also suggest that  
515 commonly prescribed and abused opioids, which primarily act through MOR, could alter the  
516 relative influences of glutamate inputs to the striatum in addition to their postsynaptic effects on  
517 striatal MSNs.

518

## 519 **Materials and Methods**

520 All procedures were approved by Oregon Health & Science University Institutional Animal Care  
521 and Use Committee (IACUC). Mice of both sexes were used in all experiments and were five to  
522 eight weeks of age at the time of brain slice preparation. Stereotaxic injections were performed  
523 on three- to five-week-old mice. Mice were housed in group housing, given free access to food  
524 and water, and maintained on a 12-hour light/ dark cycle. List of resources can be found in table  
525 1. The software, and data sets generated and analyzed during the current study are available upon  
526 request.

527

## 528 **Viral Injection**

529 Stereotaxic injections were performed as previously described (Hunnicuttt et al., 2014, Birdsong  
530 et al., 2015) to deliver recombinant adeno-associated virus (AAV) to express channelrhodopsin  
531 variants. Briefly, mice were deeply anesthetized with isofluorane and head fixed into a  
532 stereotaxic alignment system (Kopf Instruments, Tujunga, CA, with custom modifications).  
533 Small holes were drilled through the skull above the desired injection site and a glass pipette  
534 filled with virus was lowered through the hole to the desired injection depth. A small volume (20  
535 - 40 nl) of virus was injected (WTB and KAE: Nanoject II, Drummond Scientific, Broomall, PA;  
536 BCJ: custom-built injector based on a MO-10, Narishige, Amityville, NY). Injection coordinates  
537 are listed below in mm for medial/lateral (M/L), anterior/posterior from bregma (A/P), and  
538 dorsal/ ventral from the top of the skull directly over the target area. Target areas included (in  
539 mm): medial thalamus (MThal): M/L: 0.55, A/P: -1.2, D/V: 3.6; anteromedial thalamus  
540 (AMThal): M/L: 0.55, A/P: -0.4, D/V: 3.4; anterior cingulate cortex (ACC): M/L: 0.4, A/P: 0.7,  
541 D/V:1.6; prefrontal cortex (PFC): M/L: 0.45, A/P: 1.75, D/V: 1.6, dorsomedial striatum (DMS);  
542 M/L: 1.5; A/P: 0.55, D/V: 3.6 to 3.3.

543

## 544 **Brain Slice Electrophysiology**

545 Two to three weeks after viral injection, acute brain slices were prepared. Two different slicing  
546 protocols were used depending on whether recordings were being obtained from the striatum or  
547 ACC. Recordings were made from both slicing solutions and similar results were obtained.

548

549 For striatal recordings, coronal brain slices (250 - 300  $\mu\text{m}$ ) were prepared from either ice-cold or  
550 room temperature Krebs buffer containing (in mM): 125 NaCl, 21.4 NaHCO<sub>3</sub>, 11.1 D-glucose,  
551 2.5 KCl, 1.2 MgCl<sub>2</sub>, 2.4 CaCl<sub>2</sub>, 1.2 NaH<sub>2</sub>PO<sub>4</sub>, ~305 mOsm, supplemented with 5  $\mu\text{M}$  MK-801  
552 and saturated with 95% O<sub>2</sub>/5% CO<sub>2</sub>. Slices were incubated in oxygenated Krebs buffer  
553 supplemented with 10  $\mu\text{M}$  MK-801 for 30 minutes at 33 °C and then maintained in a holding  
554 chamber at 22 – 24 °C.

555

556 For cortical recordings, coronal brain slices (300 – 350  $\mu\text{m}$ ) were prepared in a carbogen  
557 saturated choline-based cutting solution containing (in mM): 110 choline chloride, 25 NaHCO<sub>3</sub>,  
558 25 glucose, 2.5 KCl, 7 MgCl<sub>2</sub>, 0.5 CaCl<sub>2</sub>, 1.25 NaH<sub>2</sub>PO<sub>4</sub>, 11.5 sodium ascorbate, and 3 sodium  
559 pyruvate, ~315 mOsm. Slices were incubated in oxygenated artificial cerebrospinal fluid (aCSF)  
560 containing (in mM): 127 NaCl, 25 NaHCO<sub>3</sub>, 25 D-glucose, 2.5 KCl, 1 MgCl<sub>2</sub>, 2 CaCl<sub>2</sub>, and 1.25  
561 NaH<sub>2</sub>PO<sub>4</sub> for 30 minutes at 33 – 34 °C and then maintained in a holding chamber at 22 – 24 °C.

562 Two experimenters (WTB and BCJ) using two rigs performed whole-cell recordings;  
563 experimenters' initials below note differences between experimental setups. There were no  
564 differences in results between experimenters so all data were pooled. Recordings were obtained  
565 at near-physiological temperature (32 - 34 °C) from slices superfused with (BCJ) oxygenated  
566 aCSF supplemented with (in  $\mu\text{M}$ , see table 1): 10 GABA<sub>B</sub>-receptor antagonist CGP 52432, 10  
567 GABA<sub>A</sub>-receptor antagonist SR-95531, 10 nicotinic acetylcholine receptor Mecamylamine, 10  
568 muscarinic acetylcholine receptor antagonist Scopolamine, 0.3 metabotropic glutamate receptor  
569 5 antagonist MPEP, 5 NMDA receptor antagonist CPP, or (WTB) oxygenated Krebs  
570 supplemented with (in  $\mu\text{M}$ , see table 1): 0.2 GABA<sub>B</sub>-receptor antagonist CGP 55845, 10

571 GABA<sub>A</sub>-receptor antagonist picrotoxin, 1 mecamylamine, 0.1 muscarinic acetylcholine receptor  
572 antagonist atropine or 0.1 scopolamine and 0.3 MPEP, preincubated in 5 MK-801.

573

#### 574 **Electrophysiology Data Acquisition**

575 Borosilicate pipettes (2.8 – 4 MΩ; Sutter Instruments, Novato, CA) were filled with potassium  
576 gluconate-based internal solution (in mM: 110 potassium gluconate, 10 KCl, 15 NaCl, 1.5  
577 MgCl<sub>2</sub>, 10 HEPES, 1 EGTA, 2 Na<sub>2</sub>ATP, 0.3 Na<sub>2</sub>GTP, 7.8 phosphocreatine; pH 7.35 – 7.40;  
578 ~280 mOsm) for striatal recordings. Putative MSNs were identified by their morphology and  
579 stereotypic physiological properties. Evoked excitatory postsynaptic currents (EPSCs) were  
580 recorded in whole-cell voltage-clamp mode at -75 mV holding potential.

581

582 To facilitate measurement of both GABA<sub>A</sub>- and AMPA-mediated currents, cortical recordings  
583 were obtained using a low-chloride cesium gluconate solution (in mM: 135 Glucaronic acid, 1  
584 EGTA, 1.5 MgCl<sub>2</sub>, 10 HEPES, 2 Na<sub>2</sub>ATP, 0.3 GTP, 7.8 Na<sub>2</sub> Phosphocreatine, titrated to pH  
585 7.35-7.4 with CsOH, ~280 mOsm and 3 QX314 chloride added fresh before experiment) in the  
586 absence of GABA<sub>A</sub> antagonists. Sodium and chloride reversal-potentials were empirically  
587 determined by recording spontaneous EPSCs/IPSCs, isolated by presence of GABAergic or  
588 glutamatergic antagonists, respectively, under a range of holding potentials (-90 to 40 mV with 5  
589 mV increments each for 1 minute recording duration). oEPSC and oIPSC were recorded at -55  
590 and 5 mV, respectively.

591

592 Whole-cell voltage clamp recordings were collected by WTB using an Axopatch 200A amplifier  
593 (Molecular Devices, San Jose, CA), digitized at 20 kHz (Instrutech ITC-16, New York, NY), and

594 recorded (Axograph X software), and by BCJ using an Multiclamp 700B amplifier (Molecular  
595 Devices) digitized at 10 kHz and recorded with *Ephus* software ([www.ephus.org](http://www.ephus.org)). Optically  
596 evoked currents were elicited by LED illumination through the microscope objective (WTB and  
597 BCJ, Olympus, Tokyo, Japan, BX51W with 60X, 1.0 NA water immersion objective, except for  
598 polysynaptic circuit activation which utilized a 20X, 0.5 NA water immersion objective), or by  
599 laser illumination (473 nm Crystal Laser, Reno, NV) through the microscope objective (BCJ,  
600 details see Mao et al., 2011 Neuron). In brief, laser beam position was controlled by  
601 galvanometer scanners (Cambridge Technology, Bedford, MA). Beam was passed through an air  
602 objective (4 x, 0.16 NA, UPlanApo, Olympus, beam diameter ~8-16  $\mu\text{m}$ ). Timing and light  
603 power of the laser stimulation was controlled by a TTL-controlled shutter (Uniblitz, Rochester,  
604 NY) with typical dwell time 1 ms (up to 5 ms for polysynaptic and loose cell-attached  
605 experiments in Figures 6 and 7), and a circular gradient neutral-density filter of 0.04-1.5 optical  
606 density (Edmund Optics, Barrington, NJ) set to yield typical 3-5 mW power after objective,  
607 respectively. For LED stimulation a TTL-controlled LED driver and 470 nm LED (Thorlabs,  
608 Newton, NJ) were used to illuminate the slice directly over the recorded cell generally with  
609 ~1mW of power for 0.5 ms or 1 ms, although power was increased or decreased if evoked  
610 currents were unusually weak or strong, respectively. For two-wavelength optical excitation,  
611 single flashes of 470 nm (1 msec, < 0.5 mW) and 625 nm LEDs (3 ms, 1.4 mW, Thorlabs) were  
612 used.

613

#### 614 **Electrophysiology Data Analysis**

615 Data collected by WTB were analyzed either in Axograph or Matlab, data collected by BCJ in  
616 *Ephus* were analyzed in Matlab. Pooled data were processed in Matlab and R. All collected data

617 were analyzed using the same protocols. Peak current amplitude was calculated relative to mean  
618 current during 50 ms baseline prior to the stimulus. In three cases the recorded oIPSCs (recorded  
619 as positive current) was completely blocked in the presences of DAMGO, yielding a small  
620 negative current deflection (residual EPSC-mediated sodium current as a result of imperfect  
621 voltage-clamp at the estimated sodium-reversal potential). To calculate agonist effects on the  
622 oIPSCs relative to baseline recordings the small negative currents were substituted with a  
623 positive current value (0.00001 pA). Signal latencies were calculated between stimulation and  
624 10% of peak current for oEPSCs or peak of action potentials. Charge transfer was calculated by  
625 integrating recorded current during a defined time window following photostimulation described  
626 below after stimulation and was corrected by baseline charge transfer during a time window  
627 measured immediately prior to stimulation. In figure S5C a large portion of “non-responding”  
628 cells were observed in experiments from “tail” injected mice (hippocampus + retrosplenial  
629 cortex). In order to determine the charge transfer in an unbiased way, we first determined the  
630 averaged onset, rise, and decay time of monosynaptic inputs to the recorded cells (thalamic and  
631 cortical inputs to the MSNs, thalamic inputs to the L2/3 or L5 pyramidal neurons), and  
632 determined the integration time window (averaged rise + decay time) and the time position  
633 relative to stimulation (averaged onset time) for individual cell types. These cell type-specific  
634 integration time windows and positions allowed us to determine the charge transfer in an  
635 unbiased way in both responding and non-responding cells. Charge transfer of polysynaptic  
636 currents (**Figure 7C**) were calculated as integrated current between onset and decay time  
637 window, both defined as 10% of peak current.

638

639 **Retrograde Bead Injection and Tissue Processing**

640 Red and green RetroBeads (Lumafluor, Durham, NC) were injected similar to viral injections  
641 described above with the exception that 100 and 200 nl of RetroBeads were injected into the  
642 cortex and striatum, respectively. Five days post-injection, mice were transcardially perfused  
643 with phosphate-buffered saline (PBS) followed by 4% formaldehyde in PBS. Brains were  
644 dissected and stored overnight in 4% formaldehyde in PBS. Sections containing injection sites  
645 were sliced at 100  $\mu\text{m}$  thickness, and sections containing the thalamus were sliced at 50  $\mu\text{m}$   
646 thickness and stained with DAPI (300 nM in PBS) to label nuclei.

647

#### 648 **Fluorescent Imaging and Analysis for Retrograde Bead Labeling**

649 Thalamic sections containing red and green retrobeads were imaged at 20x magnification using  
650 three laser lines (405, 488 and 561 nm) on a Yokogawa spinning disk confocal microscope (Carl  
651 Zeiss, Oberkochen, Germany). A Z-stack series was acquired with a 0.44  $\mu\text{m}$  optical section  
652 thickness, and for each image 3 x 3 tiles with 15% overlap were applied. Laser power and  
653 exposure times were identical for all images. Retrobead-labeled cells were manually counted on  
654 Imaris 9.0 software (Bitplane) and each slice was recounted twice with consistent exposure  
655 settings to generate an average. A cell was counted if at least two punctate fluorescent spots were  
656 orthogonally detected directly adjacent to DAPI-labeled nuclei. Colocalization of dual-color  
657 spots was quantified using a built-in Imaris function with criteria that red and green-labeled spots  
658 must be spaced no more than 8  $\mu\text{m}$  apart.

659

660 Subsequent imaging alignment was performed according to the mouse brain atlas (Franklin &  
661 Paxinos, 2001), and aligned using Adobe Photoshop and Illustrator. Sections containing the  
662 mediodorsal thalamus were aligned to the corresponding mouse brain atlas section (Figure 45,



663 Franklin & Paxinos, 2001) using the hippocampus, habenula, and third ventricle as landmarks;  
664 and red, green, and red/green colocalized cells were hand-traced onto the aligned atlas figure.  
665 Injection sites were imaged on a brightfield epifluorescent microscope (Olympus MVX10) using  
666 identical settings, and uniform thresholds were established using fluorescent values from the top  
667 90% brightest pixels (ImageJ). The outline of each injection site was aligned to a representative  
668 mouse brain atlas section to view the average injection area (for the ACC, Figure 22 and for the  
669 DMS, Figure 28 of the Franklin and Paxinos atlas, second edition (Franklin and Paxinos, 2001).

670

### 671 **Retrograde Viral Cell Labeling**

672 A 60 nl viral mix containing a 3:1 ratio of AAV2retro-Cre (AAVrg-pmSyn1-EBFP-cre,  
673 Addgene) and AAV2-GFP (UNC viral core) was injected into the ACC, and a 90 nl injection of  
674 AAV2 FLEX-tdTomato (UNC viral core) was injected in the ipsilateral MThal. Three weeks  
675 post-injection, mice were transcardially perfused as described above and brains were sectioned  
676 50  $\mu$ m thick in PBS the following day.

677

### 678 **Immunohistochemistry and Imaging for Retrograde Viral Cell label**

679 All incubation steps were performed on a shaker and at room temperature unless otherwise  
680 stated. Immediately post-slicing, sections were washed with PBS, and then permeabilized for 20  
681 minutes with 1% Triton X-100 in PBS. Sections were subsequently incubated for 1 hour in  
682 blocking solution containing PBS with 1% triton X-100 and 0.5% fish skin gelatin (FSG). Rabbit  
683 anti-DsRed (Clontech, Mountain View, CA) and chicken anti-GFP (Invitrogen, Carlsbad, CA)  
684 primary antibodies diluted 1:500 in the blocking solution were incubated at 4°C overnight.  
685 Secondary antibodies were diluted 1:750 and incubated for 2 hours in the blocking solution.

686 Sections were stained with 300 nM DAPI for 30 minutes to label nuclei, then mounted on  
687 microscope slides and embedded in an aqueous-based mounting solution (Fluoromount, Sigma  
688 Aldrich, Saint Louis MO). Imaging conditions are similar to retrograde bead labeling  
689 experiments. Red and green axons in the DMS were imaged at 63x using a Zeiss LSM 880 with  
690 Airyscan on a single tile with 0.44  $\mu\text{m}$  optical section thickness.

691

### 692 **PV/DOR In Situ Hybridization**

693 Advanced Cell Diagnostics RNAscope Technology (ACD Bioscience, Newark, CA) was used to  
694 quantify cells containing *Oprd1* and *Pvalb* mRNA. Briefly, wild-type mice (five to eight weeks  
695 old) were deeply anesthetized with ketamine-xylazine and perfused transcardially with 0.1 M  
696 PBS, followed by 4% formaldehyde solution in phosphate buffer (PB). Brain was dissected,  
697 cryoprotected in 30% sucrose overnight and then frozen in OCT. Frozen tissue was sectioned at  
698 20  $\mu\text{m}$ , transferred onto Superfrost Plus slides and kept at  $-80^{\circ}\text{C}$ . Tissue was thawed from  $-80^{\circ}\text{C}$ ,  
699 washed with PBS at room temperature and subsequently processed according to the  
700 manufacturer's protocol. We first pretreated the tissue with solutions from the pretreatment kit to  
701 permeabilize the tissue, and then incubated with protease for 30 minutes and the hybridization  
702 probes for another 2 hours at  $40^{\circ}\text{C}$ . (Wang et al., 2018)

703

### 704 **PV/ DOR Immunohistochemistry**

705 A previously described immunostaining protocol was employed (Bardoni et al., 2014; Scherrer et  
706 al., 2009). Briefly, five to eight week-old mice were deeply anesthetized with ketamine-xylazine  
707 and perfused transcardially with 0.1 M PBS, followed by 4% formaldehyde solution in 0.1 M  
708 PB. The brain was dissected, post-fixed for 4 hours at  $4^{\circ}\text{C}$ , and cryoprotected overnight in 30%  
709 sucrose in PBS. Frozen brain tissue was then sectioned at 40  $\mu\text{m}$  and incubated with a 5% NDST  
710 blocking solution (0.3% Triton X-100 solution in 0.1 M PBS plus with 5% normal donkey

711 serum) for at least 1 hour. The primary antibody was diluted in the same solution, and incubated  
712 with brain sections overnight at 4°C. After washing the primary antibody three times for 5 min  
713 with 0.3% Triton X-100 solution in 0.1 M PBS, sections were incubated with secondary antibody  
714 solution in 1% NDST solution at room temperature for 2 hours. Sections were then mounted on  
715 microscope slides with Fluoromount (Southern Biotech, Birmingham, AL) after washing with  
716 PB for three times for 5 min. Images were acquired with a confocal microscope (Leica DM2500,  
717 Wetzlar, Germany). The following primary antibodies were used: anti-GFP: Abcam (chicken;  
718 1:1,000); anti-Parvalbumin: Swant (goat; 1:1,000).

719

## 720 **Quantification and Statistical Analysis**

721 For electrophysiology experiments, to avoid observer-bias all data was quantified using  
722 automated custom-written analysis software, followed by manual confirmation. For *in-situ*  
723 hybridization experiments, signals were manually counted, and cells displaying 5 or more  
724 labeled dots in their cytoplasm were considered positive. All experiments involving conditions  
725 (baseline, agonist, antagonist) were first tested with a Skillings-Mack test for significant changes  
726 in any of the conditions. Only when a significant change was reported ( $\alpha = 0.05$ ), three  
727 Wilcoxon signed-rank tests between combination of conditions was performed, unless stated  
728 otherwise. The Skillings-mack test is a non-parametric test, which allows for missing data points  
729 (unbalanced design). Dual-channelrhodopsin experiments (Figures 1D and S2H) required a  
730 linear mixed model (LMM) since a 3-way ANOVA could not be performed due to unbalanced  
731 design. LMM accounted for correlation of measurement within individual cells (random effects).  
732 The fixed effects in the LMM were opioid type (mu vs. delta), source (MThal vs. ACC/PFC),  
733 condition (baseline vs. agonist vs. antagonist), as well as all interactions referred in the text as

734 two-way (opioid type x source, opioid type x condition, source x condition) and three-way  
735 (opioid type x source x condition). Due to the paucity of observations ( $n = 7/8$ ) and high number  
736 of fixed effects, we relaxed the type I error for the LMM to detect significant trends in  
737 interactions ( $\alpha = 0.15$ ). *Post-hoc* analysis of *a priori* hypothesis for specific comparisons were  
738 performed using linear combinations based on the LMM ( $\alpha = 0.05$ ). The number of experiments  
739 performed with independent mice (N) and recorded neurons or counted slices, in case of *in situ*  
740 hybridization or immunohistochemistry, (n) is indicated in the legends. Error bars represent  
741 standard error of the mean.

742

743 Table 1. List of Reagents and Resources used in this study.

| REAGENT or RESOURCE                                              | SOURCE                | IDENTIFIER                        |
|------------------------------------------------------------------|-----------------------|-----------------------------------|
| <b>Antibodies</b>                                                |                       |                                   |
| Living Colors DsRed Polyclonal Anibody                           | Takara Bio/Clontech   | Cat# 632496<br>RRID: AB_10013483  |
| Anti-GFP chicken IgY fraction                                    | Thermo Fisher         | Cat# A10262<br>RRID: AB_2534023   |
| Alexa Fluor 488 goat anti-chicken IgG                            | Thermo Fisher         | Cat# A11039<br>RRID: AB_2534096   |
| Alexa Fluor 594 goat anti-rabbit IgG (H + L)                     | Thermo Fisher         | Cat# A11012<br>RRID: AB_2534079   |
| Anti-parvalbumin goat                                            | Swant                 | Cat# PVG 214<br>RRID: AB_10000345 |
| Anit-GFP chicken                                                 | Abcam                 | Cat# ab13970<br>RRID: AB_300798   |
| <b>Virus Strains</b>                                             |                       |                                   |
| AAV2-syn-hChr2 (H134R)-EYFP                                      | UNC virus vector core | NA                                |
| AAV2-syn-hChr2 (H134R)-tdTomato (Mao et al. 2011)                | UPenn Vector Core     | NA                                |
| AAV2-syn-ChrimsonR-tdTomato (Klaoetke et al., 2014)              | UNC virus vector core | NA                                |
| AAV2-syn-CsChR-GFP (Klaoetke et al., 2014)                       | UNC virus vector core | NA                                |
| AAVrg-pmSyn1-EBFP-cre (Madisen et al., 2015, Tervo et al., 2016) | Addgene               | Cat# 51507                        |
| AAV2-FLEX-TdTomato                                               | UNC virus vector core | NA                                |
| AAV2-SSpEMBOL-CBA-GFP                                            | UNC virus vector core | NA                                |
| AAV1-CAG-hChr2 (H134R)-TdTomato                                  | UPenn Vector Core     | NA                                |
| AAV2-DIO-ChR2 (H134R)-EYFP                                       | UNC virus vector core | NA                                |
| <b>Chemicals and Peptides</b>                                    |                       |                                   |
| Mecamylamine                                                     | R&D Systems/Tocris    | Cat# 2843                         |
| Scopolamine                                                      | Sigma Aldrich         | Cat# S1013                        |
| SR95531                                                          | Hello Bio             | Cat# HB0901                       |
| Picrotoxin                                                       | Hello Bio             | Cat# HB0506                       |
| [Met <sup>5</sup> ] Enkephalin                                   | Sigma Aldrich         | Cat# M6638                        |
| DAMGO                                                            | Sigma Aldrich         | Cat# E7384                        |
| CTAP                                                             | R&D Systems/Tocris    | Cat# 1560                         |
| Naloxone                                                         | Abcam                 | Cat# ab120074                     |
| DPDPE                                                            | Sigma Aldrich         | Cat# E-3888                       |
| Naltrindole                                                      | Sigma Aldrich         | Cat# N-115                        |
| ICI 174,864                                                      | R&D Systems/Tocris    | Cat# 0820                         |
| MK801                                                            | Hello Bio             | Cat# HB0004                       |
| CPP                                                              | R&D Systems/Tocris    | Cat# 0173                         |
| CGP 55845                                                        | R&D Systems/Tocris    | Cat# 1248                         |
| Bestatin                                                         | Sigma Aldrich         | Cat# B8385                        |
| Thiorphan                                                        | Sigma Aldrich         | Cat# T6031                        |

|                                                                                       |                           |                                    |
|---------------------------------------------------------------------------------------|---------------------------|------------------------------------|
| MPEP                                                                                  | R&D Systems/Tocris        | Cat# 1212                          |
| Red Retrobeads IX                                                                     | Lumafluor Inc             | Cat# R180                          |
| Green Retrobeads IX                                                                   | Lumafluor Inc             | Cat# R180                          |
| DNQX                                                                                  | Sigma Aldrich             | Cat# D0540                         |
| QX314                                                                                 | R&D Systems/Tocris        | Cat# 2313                          |
| <b>Critical Commercial Assays</b>                                                     |                           |                                    |
| RNAscope Multiplex Fluorescent Assay                                                  | Advanced Cell Diagnostics | Cat# 320850                        |
| RNAscope® Probe- Mm-Oprd1                                                             | Advanced Cell Diagnostics | Cat# 427371                        |
| RNAscope® Probe- Mm-Pvalb-C2                                                          | Advanced Cell Diagnostics | Cat# 421931-C2                     |
| <b>Experimental Models: Strains</b>                                                   |                           |                                    |
| Mouse: C57BL/6J                                                                       | Jackson Laboratories      | Cat# 000664 RRID: IMSR_JAX:000664  |
| Mouse: Ai32 (B6;129S- <i>Gt(ROSA)26Sor<sup>tm32(CAG-COP4*H134R/EYFP)</sup>Hze/J</i> ) | Jackson Laboratories      | Cat# 012569 RRID: IMSR_JAX:012569  |
| Mouse: Ai9 (B6.Cg- <i>Gt(ROSA)26Sor<sup>tm9(CAG-tdTomato)</sup>Hze/J</i> )            | Jackson Laboratories      | Cat# 007909 RRID: IMSR_JAX: 007909 |
| Mouse: <i>PV-IRES-Cre</i> (B6.129P2- <i>Pvalbtm1(cre)Arbr/J</i> )                     | Jackson Laboratories      | Cat# 008069 RRID: IMSR_JAX: 008069 |
| Mouse: <i>vGlut2-IRES-Cre</i>                                                         | Jackson Laboratories      | Cat# 016963 RRID: IMSR_JAX: 016963 |
| <b>Software</b>                                                                       |                           |                                    |
| FIJI 1.49b                                                                            | Wayne Rasband, NIH        |                                    |
| AxoGraph 1.4.4                                                                        | Axograph                  |                                    |
| Microsoft Excel 2011                                                                  | Microsoft Corp.           |                                    |
| Illustrator CS5                                                                       | Adobe Systems             |                                    |
| Photoshop CS5                                                                         | Adobe Systems             |                                    |
| Prism 6                                                                               | GraphPad                  |                                    |
| Imaris                                                                                | Bitplane                  |                                    |
| Zen                                                                                   | Zeiss                     |                                    |
| Chart 5                                                                               | AD Instruments            |                                    |
| Matlab r2007b and r2018a                                                              | Mathworks                 |                                    |
| R (3.5.0)                                                                             | R Development Core Team   |                                    |
| Ephus                                                                                 | Vidrio Technologies, LLC  |                                    |

744

745 **Acknowledgements:**

746 We would like to thank Dr. John Williams for providing guidance and financial support to W.T.

747 B. (NIH R01DA08136), and Dr. Emmeke Aarts and Sheila Markwardt M.P.H. for providing

748 guidance and comments on the statistical analyses. We thank Drs. John Williams, Haining

749 Zhong, and Brooks Robinson for comments to the manuscript. This work was supported by NIH

750 grants R01DA042779 (W.T.B.), R01DA044481 (G.S.), R01NS106301 (G.S.), R01NS081071  
751 (T.M.) and U01NS094247 (T.M.), R01NS104944 (T.M.), and the New York Stem Cell  
752 Foundation (G.S.).

753

#### 754 **Author Contributions:**

755 Conceptualization: W.T.B., B.C.J., T.M.; Methodology W.T.B., B.C.J, K.A.E, D.W., G.S., T.M;  
756 Software, B.C.J; Formal Analysis, B.C.J. and W.T.B.; Investigation, W.T.B, B.C.J, K.A.E,  
757 D.W.; Resources, W.T.B., G.S., T.M.; Data Curation, B.C.J., Writing-Original Draft, W.T.B. and  
758 B.C.J., Writing-Reviewing & Editing, W.T.B., B.C.J, K.A.E., D.W., G.S., T.M., Visualization,  
759 B.C.J, W.T.B, K.A.E, D.W; Supervision, W.T.B, G.S, T.M, Funding Acquisition, W.T.B, G.S,  
760 T.M.

761 **The authors declare no competing interests.**

762

#### 763 **References**

764

765 Ananthan, S., 2008. Opioid ligands with mixed  $\mu/\delta$  opioid receptor interactions: an emerging  
766 approach to novel analgesics. In *Drug Addiction* (pp. 367-380). Springer, New York, NY.

767

768 Atwood, B.K., Kupferschmidt, D.A. and Lovinger, D.M., (2014). Opioids induce dissociable  
769 forms of long-term depression of excitatory inputs to the dorsal striatum. *Nature*  
770 *neuroscience*, 17(4), p.540.

771

772 Ballantine Jr, H.T., Cassidy, W.L., Flanagan, N.B. and Marino Jr, R., (1967). Stereotaxic anterior  
773 cingulotomy for neuropsychiatric illness and intractable pain. *Journal of neurosurgery*, 26(5),  
774 pp.488-495.

775

776 Banghart, M.R., Neufeld, S.Q., Wong, N.C. and Sabatini, B.L., (2015). Enkephalin disinhibits  
777 mu opioid receptor-rich striatal patches via delta opioid receptors. *Neuron*, 88(6), pp.1227-1239.

778

779 Bantick, S.J., Wise, R.G., Ploghaus, A., Clare, S., Smith, S.M. and Tracey, I., (2002). Imaging  
780 how attention modulates pain in humans using functional MRI. *Brain*, 125(2), pp.310-319.

781

- 782 Bardoni, R., Tawfik, V.L., Wang, D., François, A., Solorzano, C., Shuster, S.A., Choudhury, P.,  
783 Betelli, C., Cassidy, C., Smith, K. and de Nooij, J.C., (2014). Delta opioid receptors  
784 presynaptically regulate cutaneous mechanosensory neuron input to the spinal cord dorsal  
785 horn. *Neuron*, 81(6), pp.1312-1327.  
786
- 787 Berendse, H.W. and Groenewegen, H.J., (1990). Organization of the thalamostriatal projections  
788 in the rat, with special emphasis on the ventral striatum. *Journal of Comparative*  
789 *Neurology*, 299(2), pp.187-228.  
790
- 791 Birdsong, W.T., Arttamangkul, S., Bunzow, J.R. and Williams, J.T., 2015. Agonist binding and  
792 desensitization of the mu-opioid receptor is modulated by phosphorylation of the C-terminal tail  
793 domain. *Molecular pharmacology*, pp.mol-114.  
794
- 795 Boyden, E.S., Zhang, F., Bamberg, E., Nagel, G. and Deisseroth, K., (2005). Millisecond-  
796 timescale, genetically targeted optical control of neural activity. *Nature neuroscience*, 8(9),  
797 p.1263.  
798
- 799 Brundage, J.M. and Williams, J.T., (2002). Differential modulation of nucleus accumbens  
800 synapses. *Journal of Neurophysiology*, 88(1), pp.142-151.  
801
- 802 Cahill, C.M., Morinville, A., Hoffert, C., O'donnell, D. and Beaudet, A., (2003). Up-regulation  
803 and trafficking of  $\delta$  opioid receptor in a model of chronic inflammation: implications for pain  
804 control. *Pain*, 101(1-2), pp.199-208.  
805
- 806 Carr, K.D. and Bak, T.H., (1988). Medial thalamic injection of opioid agonists:  $\mu$ -agonist  
807 increases while  $\kappa$ -agonist decreases stimulus thresholds for pain and reward. *Brain*  
808 *research*, 441(1-2), pp.173-184.  
809
- 810 Casey, K.L., Minoshima, S., Berger, K.L., Koeppe, R.A., Morrow, T.J. and Frey, K.A., (1994).  
811 Positron emission tomographic analysis of cerebral structures activated specifically by repetitive  
812 noxious heat stimuli. *Journal of Neurophysiology*, 71(2), pp.802-807.  
813
- 814 Corder, G., Castro, D.C., Bruchas, M.R. and Scherrer, G., 2018. Endogenous and exogenous  
815 opioids in pain. *Annual review of neuroscience*, Jul 8, (41), pp 453-473  
816
- 817 Cui, Y., Ostlund, S.B., James, A.S., Park, C.S., Ge, W., Roberts, K.W., Mittal, N., Murphy, N.P.,  
818 Cepeda, C., Kieffer, B.L. and Levine, M.S., (2014). Targeted expression of  $\mu$ -opioid receptors in  
819 a subset of striatal direct-pathway neurons restores opiate reward. *Nature neuroscience*, 17(2),  
820 p.254.  
821
- 822 Davis, K.D., Taylor, S.J., Crawley, A.P., Wood, M.L. and Mikulis, D.J., (1997). Functional MRI  
823 of pain-and attention-related activations in the human cingulate cortex. *Journal of*  
824 *Neurophysiology*, 77(6), pp.3370-3380.  
825  
826



- 827 Delevich, K., Tucciarone, J., Huang, Z.J. and Li, B., (2015). The mediodorsal thalamus drives  
828 feedforward inhibition in the anterior cingulate cortex via parvalbumin interneurons. *Journal of*  
829 *Neuroscience*, 35(14), pp.5743-5753.
- 830
- 831 Ding, J., Peterson, J.D. and Surmeier, D.J., (2008). Corticostriatal and thalamostriatal synapses  
832 have distinctive properties. *Journal of Neuroscience*, 28(25), pp.6483-6492.
- 833
- 834 Erbs, E., Faget, L., Scherrer, G., Matifas, A., Filliol, D., Vonesch, J.L., Koch, M., Kessler, P.,  
835 Hentsch, D., Birling, M.C. and Koutsourakis, M., (2015). A mu–delta opioid receptor brain atlas  
836 reveals neuronal co-occurrence in subcortical networks. *Brain Structure and Function*, 220(2),  
837 pp.677-702.
- 838
- 839 Fields, H.L., 2004. State-dependent opioid control of pain. *Nature Reviews Neuroscience*, 5(7),  
840 p.565.
- 841
- 842 Franklin, K.B. and Paxinos, G., 2001. *The Mouse Brain in Stereotaxic Coordinates* San Diego:  
843 Academic Press.
- 844
- 845 Gracely, R.H., 1992. Affective dimensions of pain How many and how measured?. *APS*  
846 *Journal*, 1(4), pp.243-247.
- 847
- 848 Guo, N., Garcia, M.M., Taylor, B.K., Zadina, J.E. and Harlan, R.E., (2008). Blockade of mu-  
849 opioid receptors in the medial thalamus inhibits acquisition, but not expression, of morphine-  
850 induced conditioned place preference. *Neuroscience*, 151(4), pp.948-954.
- 851
- 852 Harte, S.E., Spuz, C.A. and Borszcz, G.S., (2011). Functional interaction between medial  
853 thalamus and rostral anterior cingulate cortex in the suppression of pain  
854 affect. *Neuroscience*, 172, pp.460-473.
- 855
- 856 Hippenmeyer, S., Vrieseling, E., Sigrist, M., Portmann, T., Laengle, C., Ladle, D.R. and Arber,  
857 S., 2005. A developmental switch in the response of DRG neurons to ETS transcription factor  
858 signaling. *PLoS biology*, 3(5), p.e159.
- 859
- 860 Hoffman, A.F. and Lupica, C.R., (2001). Direct actions of cannabinoids on synaptic transmission  
861 in the nucleus accumbens: a comparison with opioids. *Journal of neurophysiology*, 85(1), pp.72-  
862 83.
- 863
- 864 Huerta-Ocampo, I., Mena-Segovia, J. and Bolam, J.P., (2014). Convergence of cortical and  
865 thalamic input to direct and indirect pathway medium spiny neurons in the striatum. *Brain*  
866 *Structure and Function*, 219(5), pp.1787-1800.
- 867
- 868 Hunnicutt, B.J., Long, B.R., Kusefoglou, D., Gertz, K.J., Zhong, H. and Mao, T., 2014. A  
869 comprehensive thalamocortical projection map at the mesoscopic level. *Nature*  
870 *neuroscience*, 17(9), p.1276.
- 871

- 872 Hunnicutt, B.J., Jongbloets, B.C., Birdsong, W.T., Gertz, K.J., Zhong, H. and Mao, T., (2016). A  
873 comprehensive excitatory input map of the striatum reveals novel functional  
874 organization. *Elife*, 5.  
875
- 876 Jiang, Z.G. and North, R.A., (1992). Pre-and postsynaptic inhibition by opioids in rat  
877 striatum. *Journal of Neuroscience*, 12(1), pp.356-361.  
878
- 879 Johansen, J.P., Fields, H.L. and Manning, B.H., (2001). The affective component of pain in  
880 rodents: direct evidence for a contribution of the anterior cingulate cortex. *Proceedings of the*  
881 *National Academy of Sciences*, 98(14), pp.8077-8082.  
882
- 883 Johansen, J.P. and Fields, H.L., 2004. Glutamatergic activation of anterior cingulate cortex  
884 produces an aversive teaching signal. *Nature neuroscience*, 7(4), p.398.  
885
- 886 Kawagoe, T., Tamura, R., Uwano, T., Asahi, T., Nishijo, H., Eifuku, S. and Ono, T., (2007).  
887 Neural correlates of stimulus–reward association in the rat mediodorsal  
888 thalamus. *Neuroreport*, 18(7), pp.683-688.  
889
- 890 Klapoetke, N.C., Murata, Y., Kim, S.S., Pulver, S.R., Birdsey-Benson, A., Cho, Y.K., Morimoto,  
891 T.K., Chuong, A.S., Carpenter, E.J., Tian, Z. and Wang, J., (2014). Independent optical  
892 excitation of distinct neural populations. *Nature methods*, 11(3), p.338.  
893
- 894 Koshimizu, Y., Wu, S.X., Unzai, T., Hioki, H., Sonomura, T., Nakamura, K.C., Fujiyama, F. and  
895 Kaneko, T., 2008. Paucity of enkephalin production in neostriatal striosomal neurons: analysis  
896 with preproenkephalin–green fluorescent protein transgenic mice. *European Journal of*  
897 *Neuroscience*, 28(10), pp.2053-2064.  
898
- 899 Kreitzer, A.C., (2009). Physiology and pharmacology of striatal neurons. *Annual review of*  
900 *neuroscience*, 32, pp.127-147.  
901
- 902 Kuramoto, E., Pan, S., Furuta, T., Tanaka, Y.R., Iwai, H., Yamanaka, A., Ohno, S., Kaneko, T.,  
903 Goto, T. and Hioki, H., (2017). Individual mediodorsal thalamic neurons project to multiple  
904 areas of the rat prefrontal cortex: A single neuron-tracing study using virus vectors. *Journal of*  
905 *Comparative Neurology*, 525(1), pp.166-185.  
906
- 907 LaLumiere, R.T. and Kalivas, P.W., (2008). Glutamate release in the nucleus accumbens core is  
908 necessary for heroin seeking. *Journal of Neuroscience*, 28(12), pp.3170-3177.  
909
- 910 Le Merrer, J., Becker, J.A., Befort, K. and Kieffer, B.L., (2009). Reward processing by the  
911 opioid system in the brain. *Physiological reviews*, 89(4), pp.1379-1412.  
912
- 913 Madisen, L., Garner, A.R., Shimaoka, D., Chuong, A.S., Klapoetke, N.C., Li, L., van der Bourg,  
914 A., Niino, Y., Egolf, L., Monetti, C. et al., (2015). Transgenic mice for intersectional targeting of  
915 neural sensors and effectors with high specificity and performance. *Neuron*, 85(5), pp.942-958.  
916

- 917 Mansour, A., Fox, C.A., Burke, S., Meng, F., Thompson, R.C., Akil, H. and Watson, S.J.,  
918 (1994). Mu, delta, and kappa opioid receptor mRNA expression in the rat CNS: an in situ  
919 hybridization study. *Journal of Comparative Neurology*, 350(3), pp.412-438.
- 920
- 921 Mao, T., Kusefoglou, D., Hooks, B.M., Huber, D., Petreanu, L. and Svoboda, K., 2011. Long-  
922 range neuronal circuits underlying the interaction between sensory and motor  
923 cortex. *Neuron*, 72(1), pp.111-123.
- 924
- 925 Matthes, H.W., Maldonado, R., Simonin, F., Valverde, O., Slowe, S., Kitchen, I., Befort, K.,  
926 Dierich, A., Le Meur, M., Dollé, P. and Tzavara, E., (1996). Loss of morphine-induced  
927 analgesia, reward effect and withdrawal symptoms in mice lacking the  $\mu$ -opioid-receptor  
928 gene. *Nature*, 383(6603), p.819.
- 929
- 930 McAlonan, G.M., Robbins, T.W. and Everitt, B.J., (1993). Effects of medial dorsal thalamic and  
931 ventral pallidal lesions on the acquisition of a conditioned place preference: further evidence for  
932 the involvement of the ventral striatopallidal system in reward-related  
933 processes. *Neuroscience*, 52(3), pp.605-620.
- 934
- 935 Miura, M., Saino-Saito, S., Masuda, M., Kobayashi, K. and Aosaki, T., (2007). Compartment-  
936 specific modulation of GABAergic synaptic transmission by  $\mu$ -opioid receptor in the mouse  
937 striatum with green fluorescent protein-expressing dopamine islands. *Journal of*  
938 *Neuroscience*, 27(36), pp.9721-9728.
- 939
- 940 Muñoz, B., Fritz, B.M., Yin, F. and Atwood, B.K., (2018). Alcohol exposure disrupts mu opioid  
941 receptor-mediated long-term depression at insular cortex inputs to dorsolateral striatum. *Nature*  
942 *communications*, 9(1), p.1318.
- 943
- 944 Nagel, G., Brauner, M., Liewald, J.F., Adeishvili, N., Bamberg, E. and Gottschalk, A., (2005).  
945 Light activation of channelrhodopsin-2 in excitable cells of *Caenorhabditis elegans* triggers rapid  
946 behavioral responses. *Current Biology*, 15(24), pp.2279-2284.
- 947
- 948 Navratilova, E., Xie, J.Y., Okun, A., Qu, C., Eyde, N., Ci, S., Ossipov, M.H., King, T., Fields,  
949 H.L. and Porreca, F., (2012). Pain relief produces negative reinforcement through activation of  
950 mesolimbic reward-valuation circuitry. *Proceedings of the National Academy of*  
951 *Sciences*, 109(50), pp.20709-20713.
- 952
- 953 Navratilova, E., Xie, J.Y., Meske, D., Qu, C., Morimura, K., Okun, A., Arakawa, N., Ossipov,  
954 M., Fields, H.L. and Porreca, F., (2015). Endogenous opioid activity in the anterior cingulate  
955 cortex is required for relief of pain. *Journal of Neuroscience*, 35(18), pp.7264-7271.
- 956
- 957 Navratilova, E., Atcherley, C.W. and Porreca, F., (2015). Brain circuits encoding reward from  
958 pain relief. *Trends in neurosciences*, 38(11), pp.741-750.
- 959
- 960 Oertel, B.G., Preibisch, C., Wallenhorst, T., Hummel, T., Geisslinger, G., Lanfermann, H. and  
961 Lötsch, J., 2008. Differential opioid action on sensory and affective cerebral pain  
962 processing. *Clinical Pharmacology & Therapeutics*, 83(4), pp.577-588.

- 963  
964 Otake, K. and Nakamura, Y., (1998). Single midline thalamic neurons projecting to both the  
965 ventral striatum and the prefrontal cortex in the rat. *Neuroscience*, 86(2), pp.635-649.  
966
- 967 Parnaudeau, S., O'Neill, P.K., Bolkan, S.S., Ward, R.D., Abbas, A.I., Roth, B.L., Balsam, P.D.,  
968 Gordon, J.A. and Kellendonk, C., (2013). Inhibition of mediodorsal thalamus disrupts  
969 thalamofrontal connectivity and cognition. *Neuron*, 77(6), pp.1151-1162.  
970
- 971 Pert, C.B., Kuhar, M.J. and Snyder, S.H., 1976. Opiate receptor: autoradiographic localization in  
972 rat brain. *Proceedings of the national academy of Sciences*, 73(10), pp.3729-3733.  
973
- 974 Peyron, R., García-Larrea, L., Grégoire, M.C., Costes, N., Convers, P., Lavenne, F., Mauguière,  
975 F., Michel, D. and Laurent, B., (1999). Haemodynamic brain responses to acute pain in humans:  
976 sensory and attentional networks. *Brain*, 122(9), pp.1765-1780.  
977
- 978 Peyron, R., Laurent, B. and Garcia-Larrea, L., (2000). Functional imaging of brain responses to  
979 pain. A review and meta-analysis (2000). *Neurophysiologie Clinique/Clinical*  
980 *Neurophysiology*, 30(5), pp.263-288.  
981
- 982 Pradhan, A.A., Befort, K., Nozaki, C., Gavériaux-Ruff, C. and Kieffer, B.L., (2011). The delta  
983 opioid receptor: an evolving target for the treatment of brain disorders. *Trends in*  
984 *pharmacological sciences*, 32(10), pp.581-590.  
985
- 986 Price, D.D., (2000). Psychological and neural mechanisms of the affective dimension of  
987 pain. *Science*, 288(5472), pp.1769-1772.  
988
- 989 Rainville, P., Duncan, G.H., Price, D.D., Carrier, B. and Bushnell, M.C., (1997). Pain affect  
990 encoded in human anterior cingulate but not somatosensory cortex. *Science*, 277(5328), pp.968-  
991 971.  
992
- 993 Scherrer, G., Tryoen-Tóth, P., Filliol, D., Matifas, A., Laustriat, D., Cao, Y.Q., Basbaum, A.I.,  
994 Dierich, A., Vonesh, J.L., Gavériaux-Ruff, C. and Kieffer, B.L., 2006. Knockin mice expressing  
995 fluorescent  $\delta$ -opioid receptors uncover G protein-coupled receptor dynamics in  
996 vivo. *Proceedings of the National Academy of Sciences*, 103(25), pp.9691-9696.  
997
- 998 Scherrer, G., Imamachi, N., Cao, Y.Q., Contet, C., Mennicken, F., O'Donnell, D., Kieffer, B.L.  
999 and Basbaum, A.I., (2009). Dissociation of the opioid receptor mechanisms that control  
1000 mechanical and heat pain. *Cell*, 137(6), pp.1148-1159.  
1001
- 1002 Tanaka, E. and North, R.A., (1994). Opioid actions on rat anterior cingulate cortex neurons in  
1003 vitro. *Journal of Neuroscience*, 14(3), pp.1106-1113.  
1004
- 1005 Tervo, D.G.R., Hwang, B.Y., Viswanathan, S., Gaj, T., Lavzin, M., Ritola, K.D., Lindo, S.,  
1006 Michael, S., Kuleshova, E., Ojala, D. et al., (2016). A designer AAV variant permits efficient  
1007 retrograde access to projection neurons. *Neuron*, 92(2), pp.372-382.  
1008

- 1009 Treede, R.D., Kenshalo, D.R., Gracely, R.H. and Jones, A.K., 1999. The cortical representation  
1010 of pain. *Pain*, 79(2-3), pp.105-111.
- 1011
- 1012 Vogt, B.A., Finch, D.M. and Olson, C.R., (1992). Functional heterogeneity in cingulate cortex:  
1013 the anterior executive and posterior evaluative regions. *Cerebral cortex*, 2(6), pp.435-443.
- 1014
- 1015 Vogt, B.A., Wiley, R.G. and Jensen, E.L., (1995). Localization of mu and delta opioid receptors  
1016 to anterior cingulate afferents and projection neurons and input/output model of mu  
1017 regulation. *Experimental neurology*, 135(2), pp.83-92.
- 1018
- 1019 Vong, L., Ye, C., Yang, Z., Choi, B., Chua, S. and Lowell, B.B., (2011). Leptin action on  
1020 GABAergic neurons prevents obesity and reduces inhibitory tone to POMC  
1021 neurons. *Neuron*, 71(1), pp.142-154.
- 1022
- 1023 Wang, D., Tawfik, V.L., Corder, G., Low, S.A., François, A., Basbaum, A.I. and Scherrer, G.,  
1024 (2018). Functional Divergence of Delta and Mu Opioid Receptor Organization in CNS Pain  
1025 Circuits. *Neuron*.
- 1026
- 1027 Whitt, J.L., Masri, R., Pulimood, N.S. and Keller, A., (2013). Pathological activity in  
1028 mediodorsal thalamus of rats with spinal cord injury pain. *Journal of Neuroscience*, 33(9),  
1029 pp.3915-3926.
- 1030
- 1031 Williams, J.T., Ingram, S.L., Henderson, G., Chavkin, C., von Zastrow, M., Schulz, S., Koch, T.,  
1032 Evans, C.J. and Christie, M.J., (2013). Regulation of  $\mu$ -opioid receptors: desensitization,  
1033 phosphorylation, internalization, and tolerance. *Pharmacological reviews*, 65(1), pp.223-254.
- 1034
- 1035 Wu, Y.W., Kim, J.I., Tawfik, V.L., Lalchandani, R.R., Scherrer, G. and Ding, J.B., (2015).  
1036 Input- and cell-type-specific endocannabinoid-dependent LTD in the striatum. *Cell*  
1037 *reports*, 10(1), pp.75-87.
- 1038
- 1039 Yen, C.P., Kung, S.S., Su, Y.F., Lin, W.C., Howng, S.L. and Kwan, A.L., (2005). Stereotactic  
1040 bilateral anterior cingulotomy for intractable pain. *Journal of clinical neuroscience*, 12(8),  
1041 pp.886-890.
- 1042
- 1043 Yokota, E., Koyanagi, Y., Yamamoto, K., Oi, Y., Koshikawa, N. and Kobayashi, M., (2016).  
1044 Opioid subtype- and cell-type-dependent regulation of inhibitory synaptic transmission in the rat  
1045 insular cortex. *Neuroscience*, 339, pp.478-490.
- 1046
- 1047 Yokota, E., Koyanagi, Y., Nakamura, H., Horinuki, E., Oi, Y. and Kobayashi, M., (2016).  
1048 Opposite effects of mu and delta opioid receptor agonists on excitatory propagation induced in  
1049 rat somatosensory and insular cortices by dental pulp stimulation. *Neuroscience letters*, 628,  
1050 pp.52-58.
- 1051
- 1052 Zhang, Z., Gadotti, V.M., Chen, L., Souza, I.A., Stemkowski, P.L. and Zamponi, G.W., (2015).  
1053 Role of prelimbic GABAergic circuits in sensory and emotional aspects of neuropathic pain. *Cell*  
1054 *reports*, 12(5), pp.752-759.

1055  
1056 Zubieta, J.K., Smith, Y.R., Bueller, J.A., Xu, Y., Kilbourn, M.R., Jewett, D.M., Meyer, C.R.,  
1057 Koeppe, R.A. and Stohler, C.S., (2001). Regional mu opioid receptor regulation of sensory and  
1058 affective dimensions of pain. *Science*, 293(5528), pp.311-315.  
1059  
1060

1061 **Supplemental figures**

1062

1063 **Figure 1 – figure supplement 1**

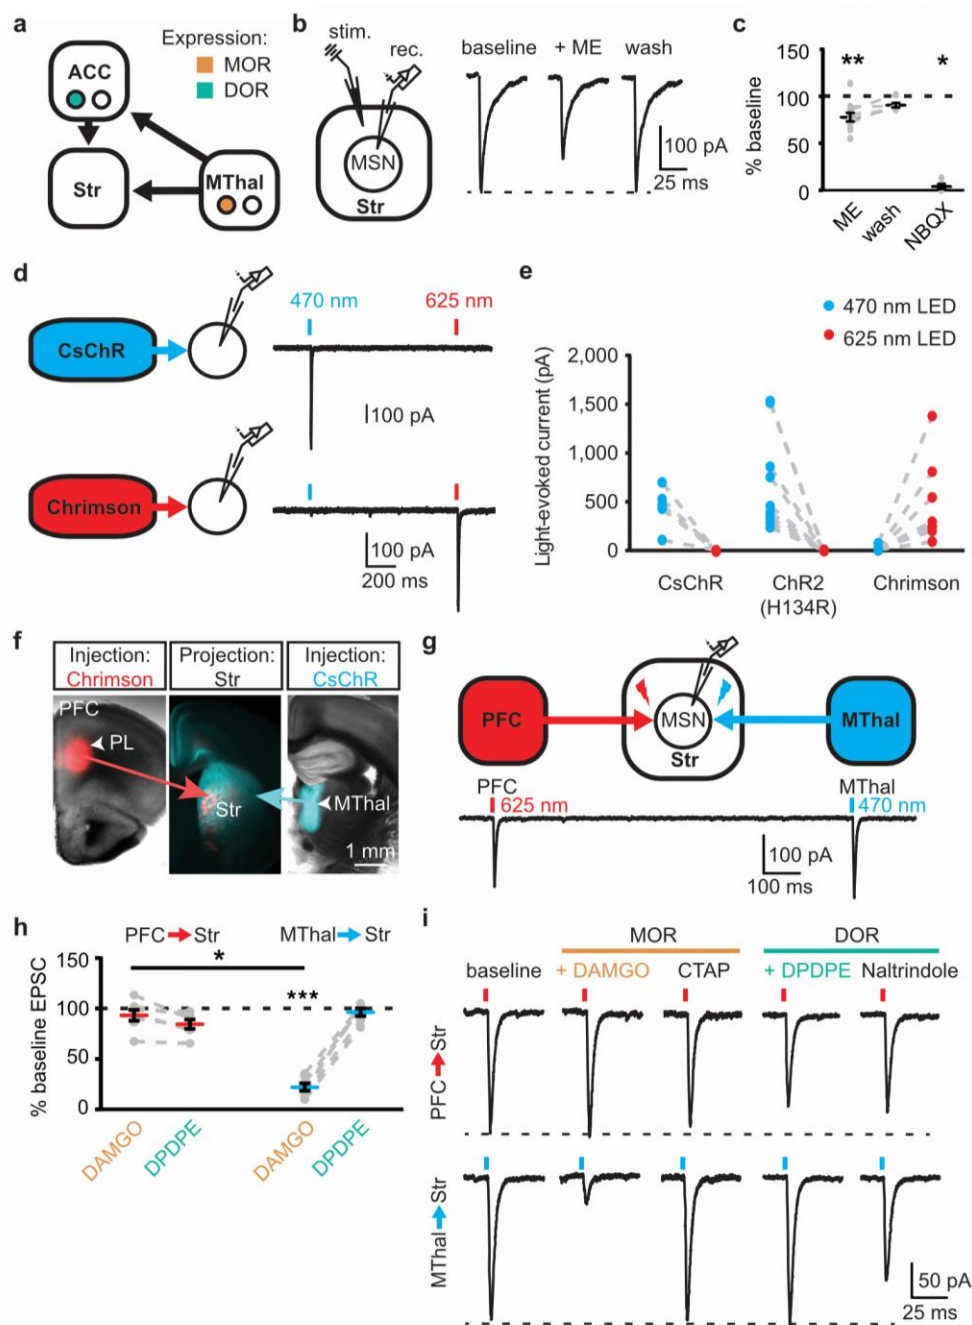

1064

1065 **Mu-opioid agonists suppress thalamic, but not cortical inputs.**

1066 (A) Schematic of thalamo-cortico-striatal circuits and putative expression pattern of MORs

1067 (orange) and DORs (teal) (Erbs et al. 2015, Hunnicutt et al. 2016). (B) Schematic and example

1068 traces of electrically-evoked EPSCs from a MSN in the DMS. ME: non-selective opioid agonist  
1069 [Met<sup>5</sup>]-enkephalin (3  $\mu$ M). (C) Summary data of opioid inhibition of EPSCs, as shown in panel  
1070 B, plotted as a percent of peak current in the drug condition relative to the baseline. ME: N = 6, n  
1071 = 11; wash: N = 3, n = 6,  $SM = 9.712$ ,  $p < 0.01$ ; baseline vs. ME:  $W(11) = 1$ ,  $p < 0.01$ ; baseline  
1072 vs. wash:  $W(6) = 1$ ,  $p = 0.063$ ; NBQX: N = 4, n = 5; baseline vs. NBQX:  $W(5) = 0$ ,  $p < 0.05$ . (D)  
1073 Independent activation of CsChR and Chrimson using two-wavelength optical excitation. CsChR  
1074 (blue): virus expressing CsChR injected into the MThal; Chrimson (red): virus expressing  
1075 Chrimson injected into the ACC. Blue bars: optical excitation with 470 nm light (1 ms, 0.5 mW);  
1076 red bars: 625 nm light (3 ms, 1.4 mW). (E) Quantification of spectral selectivity of CsChR,  
1077 ChR2(H134R), and Chrimson plotted as peak optically-evoked EPSC (oEPSC) amplitude  
1078 following 470 nm (blue) or 625 nm (red) LED optical excitation (CsChR: N = 2, n = 5,  
1079  $I_{625\text{nm}}:I_{470\text{nm}} = -.0002 \pm .0081$ , paired t-test  $p < 0.01$ ; ChR2 (H134R): N = 4, n = 10,  $I_{625\text{nm}}:I_{470\text{nm}} =$   
1080  $0.0009 \pm .002$ , paired t-test  $p < 0.01$ ; Chrimson: N = 5, n = 8,  $I_{470\text{nm}}:I_{625\text{nm}} = 0.0423 \pm 0.014$ ,  
1081 paired t-test  $p < 0.05$ ). (F) Overlaid brightfield and epifluorescent images of coronal brain slices  
1082 showing expression of CsChR in the MThal and axonal projections to the DMS (blue), and  
1083 expression of Chrimson (red) in the PFC and axonal projections to the DMS (red). (G) Two-  
1084 wavelength optical excitation elicited oEPSCs in response to 470 and 625 nm light in single  
1085 MSNs when CsChR was injected into the MThal and Chrimson was injected into the PFC. (H)  
1086 Summary data of DAMGO (1  $\mu$ M, orange) and DPDPE (1  $\mu$ M, teal) effects on oEPSCs elicited  
1087 from the MThal (blue) and PFC (red) using two-wavelength optical excitation protocol. Linear  
1088 mixed model: 3-way interaction; opioid type ( $\mu$  vs.  $\delta$  opioid) x source (PFC vs. MThal) x  
1089 condition (baseline vs. agonist vs. antagonist):  $F(4,7) = 2.171$ ,  $p = 0.174$ , N = 5, n = 7; DAMGO:  
1090  $I_{\text{MThal}}$ ;  $22.2 \pm - 3.6$  % of baseline,  $z = 3.497$ ,  $p < 0.001$ ,  $I_{\text{PFC}}$ ;  $93.9 \pm 5.6$  %,  $z = 0.052$ ,  $p = 0.958$ ;



1091 DPDPE:  $I_{MThal}$ ;  $96.4 \pm 3.9$  % of baseline,  $z = 0.087$ ,  $p = 0.931$ ;  $I_{PFC}$ :  $81.6 \pm 3.9$  %,  $z = 0.672$ ,  $p =$   
1092  $0.502$ .  $MThal_{baseline \times DAMGO}$  vs.  $ACC_{baseline \times DAMGO}$ ;  $z = -2.436$ ,  $p < 0.05$ . (I) Example traces for  
1093 summary data shown in (H). \*  $p \leq 0.05$ ; \*\*  $p \leq 0.01$ ; \*\*\*  $p \leq 0.001$ . Mean  $\pm$  standard error of the  
1094 mean. N: number of animals; n: number of recorded cells; Str: striatum; PL: prelimbic cortex.  
1095

1096 **Figure 1 – figure supplement 2**

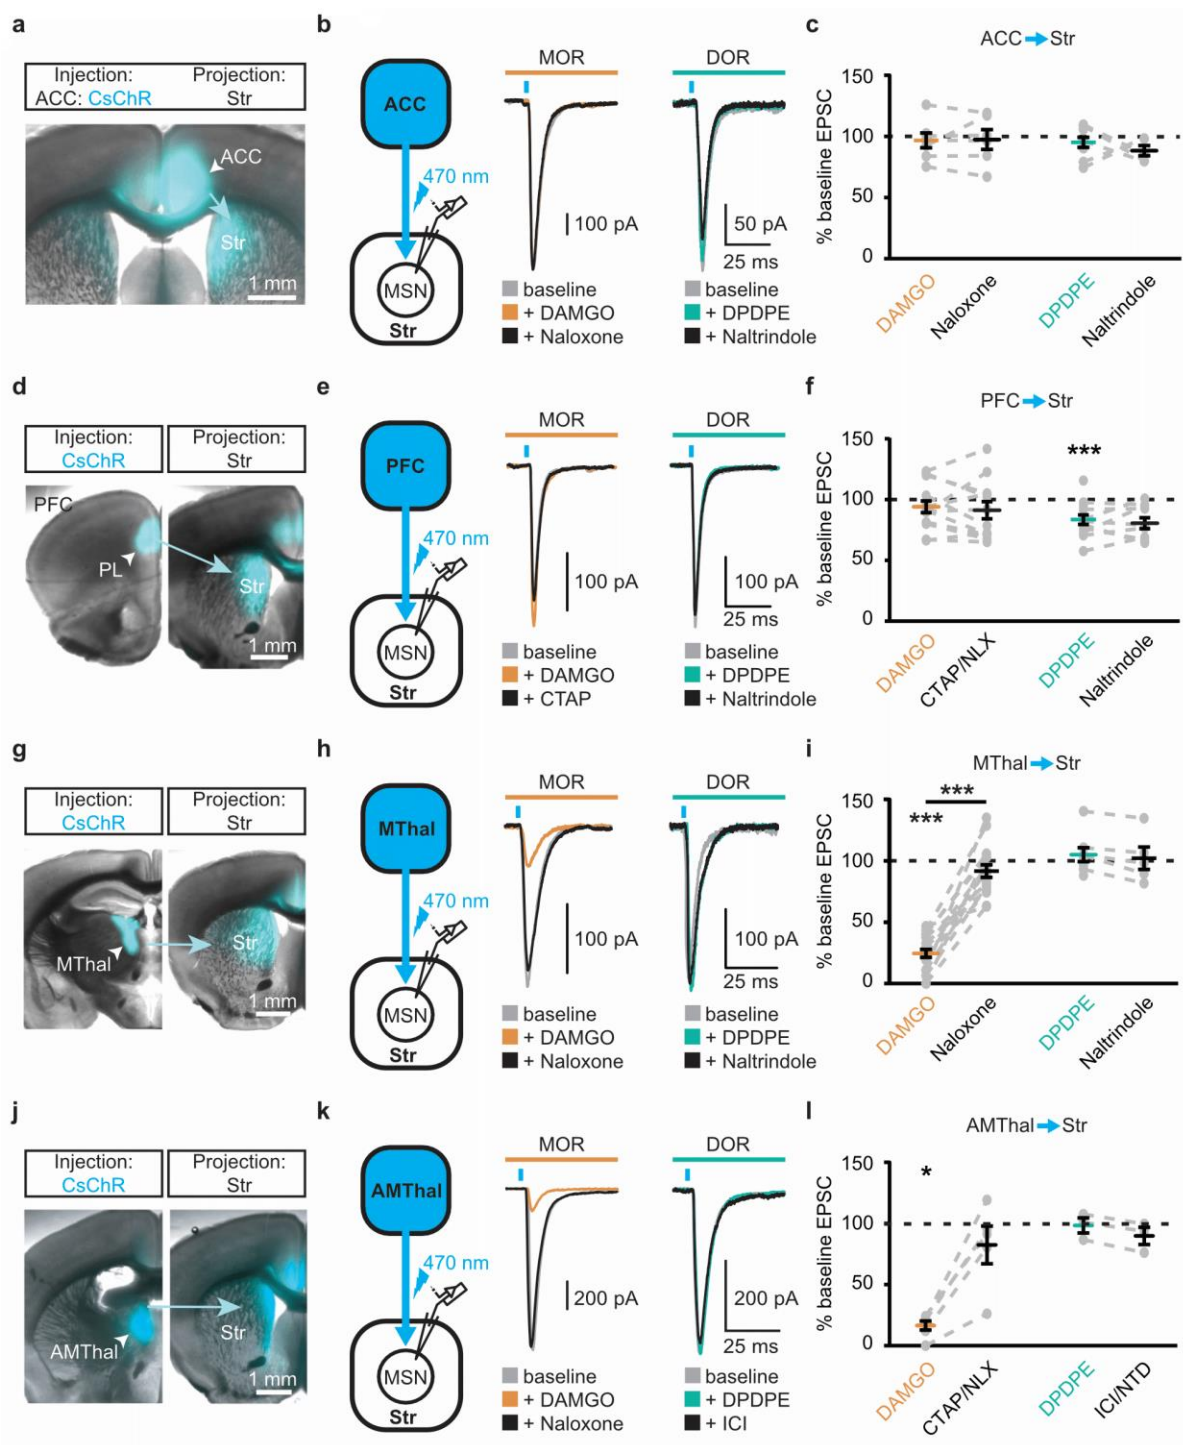

1097  
 1098 **Single channelrhodopsin injections reproduced specific effect of mu-opioid-mediated**  
 1099 **inhibition of thalamic but not cortical inputs.**

1100 Virus expressing CsChR was injected into the ACC (A-C), the PFC (D-F), the MThal (G-I), or  
1101 the anteromedial thalamus (AMThal) (J-L) as four sets of the experiments. (A, D, G, J)  
1102 Representative images of the injection and projection for the above four sets of experiments,  
1103 respectively. (B, E, H, K) Viral infection and optical stimulation schematic and example  
1104 recordings of four sets of experiments, respectively. oEPSCs were evoked under baseline  
1105 conditions (gray) and in the presence of DAMGO (1  $\mu$ M, orange) followed by CTAP or  
1106 naloxone (NLX) (1  $\mu$ M, black), or DPDPE (1  $\mu$ M, teal) followed by naltrindole (NTD) or ICI  
1107 174,864 (ICI) (0.3  $\mu$ M, black). (C, F, I, L) Summary data of effects of DAMGO, CTAP/NLX,  
1108 DPDPE, and ICI/NTD on oEPSC amplitude for the above four sets of experiments, respectively.  
1109 (C) DAMGO/naloxone: N = 4/4, n = 7/6,  $SM = 0.054$ ,  $p = 0.974$ ; DPDPE/naltrindole: N = 5/4, n  
1110 = 9/5,  $SM = 4.539$ ,  $p = 0.103$ . (F) DAMGO/naloxone: N = 9/8, n = 14/12,  $SM = 2.286$ ,  $p = 0.319$ .  
1111 DPDPE/naltrindole: N = 9/6, n = 14/10,  $SM = 8.227$ ,  $p < 0.05$ ,  $I_{DPDPE}$ :  $83.4 \pm 3.9\%$  of baseline,  
1112  $W(13) = 4$ ,  $p < 0.01$ . (I) DAMGO/naloxone: N = 15/13, n = 19/16,  $SM = 25.660$ ,  $p < 0.001$ ,  
1113  $I_{DAMGO}$ :  $24.5 \pm 3.3\%$  of baseline,  $W(19) = 0$ ,  $p < 0.001$ , DAMGO vs. naloxone,  $W(12) = 0$ ,  $p <$   
1114  $0.001$ ; DPDPE/naltrindole: N = 7/5, n = 8/5,  $SM = 2.522$ ,  $p = 0.283$ . (L) DAMGO/naloxone: N =  
1115 5/4, n = 6/5,  $SM = 9.399$ ,  $p < 0.01$ ,  $I_{DAMGO}$ :  $16.5 \pm 3.7\%$  of baseline,  $W(6) = 0$ ,  $p < 0.05$ ;  
1116 DPDPE/naltrindole: N = 2/2, n = 3/3,  $SM = 4.667$ ,  $p = 0.097$ . Skillings-Mack test followed by  
1117 paired Wilcoxon signed-ranks test *post-hoc* analysis. \*  $p \leq 0.05$ ; \*\*  $p \leq 0.01$ ; \*\*\*  $p \leq 0.001$ .  
1118 Mean  $\pm$  standard error of the mean.  $SM$ : Skillings-Mack statistic.  
1119

1120 **Figure 3 – figure supplement 1**

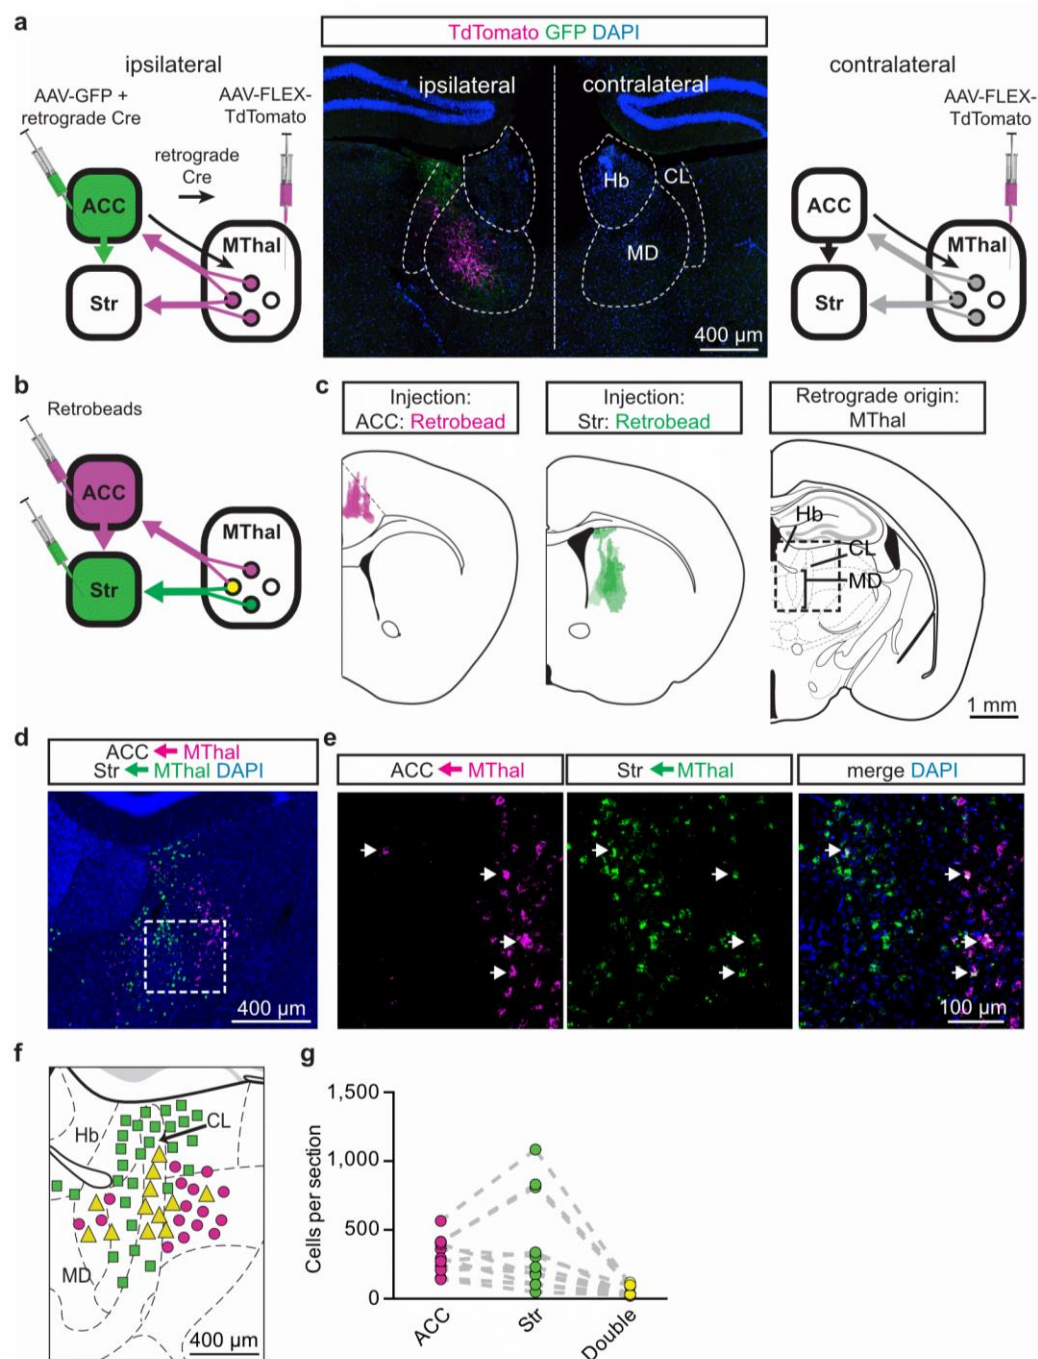

1121

1122 **A subset of mediodorsal thalamic neurons send collaterals to both the ACC and DMS.**

1123 (A) Experimental diagram in which AAV2-FLEX-TdTomato was injected bilaterally into the

1124 MThal (left and right panels) and an example image of the labeling (middle panel). A

1125 combination of AAV-GFP and AAV2-retro-Cre (retrograde Cre) was injected into the ACC  
1126 (ipsilateral, left panel). DAPI-stained (blue) coronal brain slice with retrograde labeled thalamic  
1127 neurons expressing TdTomato (red, amplified with anti-DsRed primary and Alexa 594 secondary  
1128 antibodies) and GFP-positive axons (green, amplified with anti-GFP primary and Alexa 488  
1129 secondary antibodies) originating from the ACC (middle panel). (B) Experimental diagram of  
1130 fluorescent retrograde bead injections into the ACC and the striatum. (C) Averaged retrobead  
1131 injection sites are shown in relationship to the mouse brain atlas (left panel, magenta, and center  
1132 panel, green) as described in (B). The region of interest in which fluorescent retrobeads were  
1133 imaged and counted in the MThal is shown as the squared box on an atlas section (right panel).  
1134 (D) Example image of retrobeads in the Mthal in ACC- (magenta) and Str-projecting (green)  
1135 neurons from the area outlined in (C). € High magnification images of retrobeads in the MThal  
1136 from the box outlined in (D). Arrowheads: neurons doubled labeled with both retrobeads (green  
1137 and magenta). (F) Locations of retrograde labeled neurons surrounding the MThal were mapped  
1138 onto the mouse brain atlas with estimation. Magenta circles: striatum-projecting neurons; green  
1139 squares: ACC-projecting neurons; yellow triangles: striatum-projecting and ACC-projecting  
1140 neurons. Note that the size of the markers is not to scale. (G) Summary graph showing the  
1141 number of ACC (magenta), Str (green), or double labeled (yellow) retrobead clusters quantified  
1142 per slice. Hb: habenula; CL: central lateral thalamus; MD: mediodorsal thalamus.  
1143

1144 **Figure 4 – figure supplement 1**

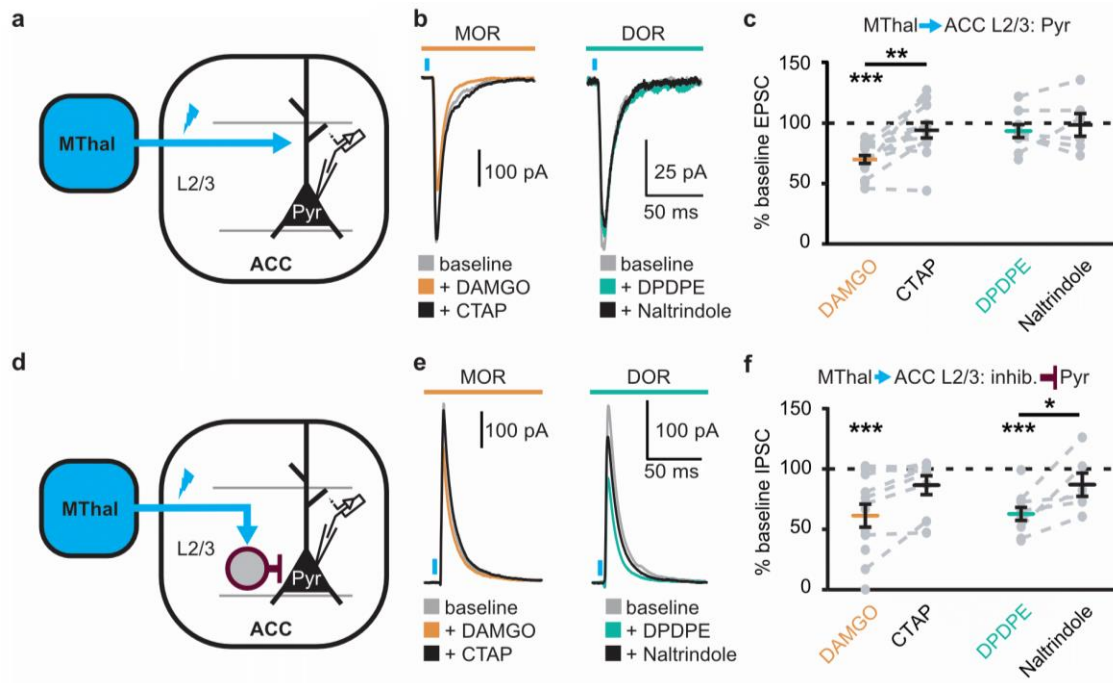

1145

1146 **Opioid inhibition of synaptic currents onto layer 2/3 pyramidal neurons in the ACC.**

1147 (A) Experimental diagram in which ChR2(H134R) (blue) was injected in the MThal, and

1148 oEPSCs were recorded from Layer 2/3 (L2/3) pyramidal neurons (Pyr) in the ACC. (B) Example

1149 recordings of oEPSCs elicited from MThal terminals in the ACC. oEPSC amplitudes in response

1150 to DAMGO (1  $\mu$ M, orange) followed by CTAP (1  $\mu$ M, black) (left panel), and oEPSC

1151 amplitudes in response to DPDPE (1  $\mu$ M, teal) followed by naltrindole (0.3  $\mu$ M, black) (right

1152 panel). (C) Summary data of oEPSC amplitudes as described in (B), plotted as a percent of

1153 baseline. DAMGO: N = 8, n = 15; CTAP: N = 8, n = 12,  $SM = 18.148$ ,  $p < 0.001$ ,  $I_{DAMGO}: 69.3 \pm$

1154 3.3% of baseline,  $W(15) = 0$ ,  $p < 0.001$ ; DAMGO vs. CTAP,  $W(12) = 5$ ,  $p < 0.01$ ; DPDPE: N =

1155 7, n = 9; naltrindole: N = 6, n = 6,  $SM = 1.866$ ,  $p = 0.393$ . (D) Experimental diagram in which

1156 ChR2(H134R) (blue) was injected in the MThal, and oIPSCs were recorded from L2/3 pyramidal

1157 neurons in the ACC. (E) Example recordings of oIPSCs elicited from MThal terminals in the

1158 ACC under baseline conditions, in response to DAMGO and CTAP, or DPDPE and naltrindole

1159 as in (B). (F) Summary data of oIPSC amplitudes as described in (C, E), plotted as a percent of  
1160 baseline. DAMGO:  $N = 7$ ,  $n = 12$ ; CTAP:  $N = 6$ ,  $n = 8$ ;  $SM = 8.882$ ,  $p < 0.05$ ,  $I_{DAMGO}$ :  $61.2 \pm$   
1161  $9.5\%$  of baseline,  $W(12) = 1$ ,  $p < 0.001$ ; DPDPE:  $N = 7$ ,  $n = 10$ ; naltrindole:  $N = 5$ ,  $n = 6$ ,  $SM =$   
1162  $13.329$ ,  $p < 0.01$ ,  $I_{DPDPE}$ :  $62.7 \pm 5.4\%$  of baseline,  $W(10) = 0$ ,  $p < 0.01$ , DAMGO vs. CTAP,  
1163  $W(6) = 0$ ,  $p < 0.05$ . Skillings-Mack test followed by paired Wilcoxon signed-rank test *post-hoc*  
1164 analysis. \*  $p \leq 0.05$ ; \*\*  $p \leq 0.01$ ; \*\*\*  $p \leq 0.001$ . Mean  $\pm$  standard error of the Mean. inhib.:  
1165 inhibitory neuron;  $SM$ : Skillings-Mack statistic.  
1166

1167 **Figure 4 – figure supplement 2**

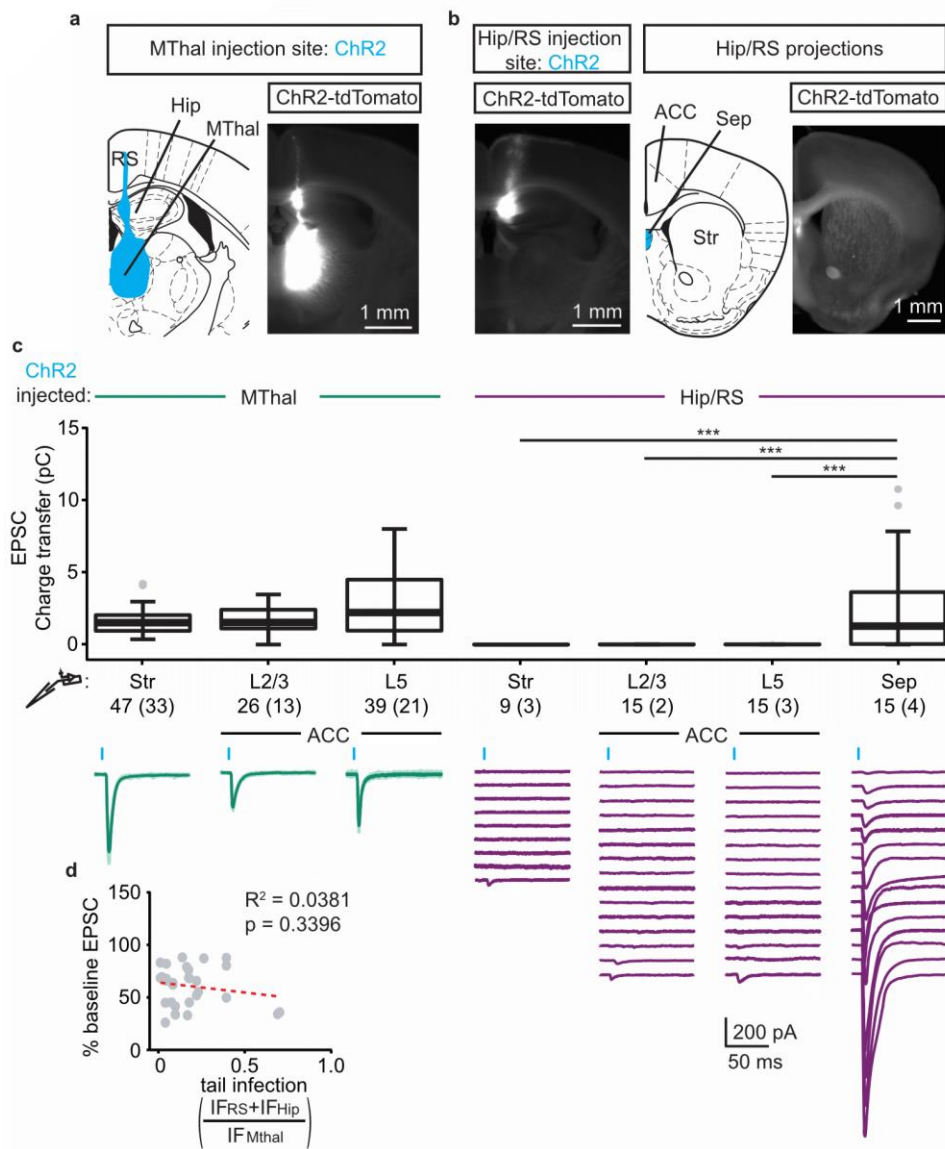

1168

1169 **Verification of origins of optically-evoked response.**

1170 (A) Representative fluorescent image (right panel) of a typical MThal ChR2 injection in which  
 1171 virus was injected in the MThal while also infecting a “tail” region including hippocampus (Hip)  
 1172 and retrosplenial cortex (RS). The fluorescence at the injection site is saturated to reveal the  
 1173 “tail” region. Schematic of ChR2(H134R)-TdTomato expression shown in blue on a section of  
 1174 the atlas (left). (B) Example fluorescent image of ChR2(H134R)-TdTomato expressed only in



1175 the “tail” region and corresponding image of projection areas (right) that highlight projections in  
1176 the septum (Sep) but lack of visible projections in the ACC and striatum following Hip/RS “tail”  
1177 injection. (C) Charge transfer of EPSCs (upper panel) recorded in striatal MSNs (Str), layer 2  
1178 and 3 (L2/3) or layer 5 (L5) pyramidal neurons following optical stimulation in mice injected  
1179 with ChR2 in either MThal or Hip/RS, as well as Sep as a positive control for the Hip/RS  
1180 injections. Hip/RS “tail” injections resulted in only occasional small amplitude oEPSCs in the Str  
1181 and ACC. Kruskal-Wallis test,  $H = 69.654$ ,  $df = 6$ ,  $p < 0.001$ ; post-hoc Dunn’s test, Bonferonni-  
1182 corrected. \*\*\*  $p \leq 0.001$ . Mean  $\pm$  standard error of the mean. Representative average recordings  
1183 (lower panel, dark green, average of 10 single trials) from the MSNs, L2/3 and L5 neurons upon  
1184 optical stimulation of ChR2(H134R) injected in the MThal as shown in (A). Averaged oEPSCs  
1185 (lower panel, purple, average of 10 single trials) of all individual neurons recorded in Hip/RS  
1186 injected mice, as shown in (B). Blue bars: 470 nm light stimulations. (D) Plot of the DAMGO  
1187 effect on baseline oEPSC amplitudes recorded in all L2/3 and L5 pyramidal neurons, as a  
1188 function of the ratio of integrated fluorescence intensity (IF) of ChR2(H134R)-TdTomato  
1189 fluorescence in RS + Hip ( $IF_{RS} + IF_{Hip}$ ) relative to MThal ( $IF_{MThal}$ ) in all the Mthal injected  
1190 groups. There was no correlation between the amount of “tail” infection and the degree of  
1191 oEPSC inhibition by DAMGO. Linear regression model,  $R^2 = 0.034$ ,  $F(1, 27) = 0.945$ ,  $p =$   
1192 0.340.  
1193

1194 **Figure 6 – figure supplement 1**

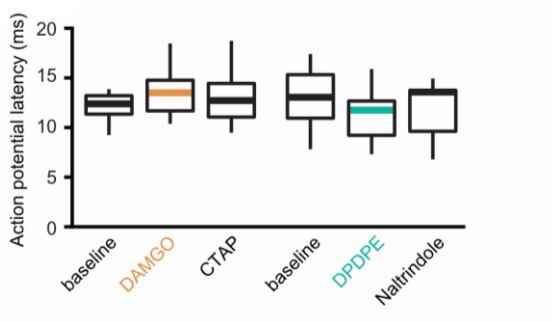

1195

1196 **Latencies of thalamocortical-evoked action potentials in ACC pyramidal neurons.**

1197 The average latency to the first action potential following optical stimulation of the MThal inputs  
1198 recorded in layer 5 (L5) pyramidal neurons (Pyr), using loose cell-attached configuration. There  
1199 were no significant differences in the latency to the first spike. DAMGO:  $N = 3$ ,  $n = 7$ ; CTAP:  $N$   
1200  $= 3$ ,  $n = 7$ ,  $SM = 2$ ,  $p = 0.368$ ; DPDPE:  $N = 4$ ,  $n = 8$ ; naltrindole:  $N = 4$ ,  $n = 8$ ,  $SM = 1.75$ ,  $p =$   
1201  $0.417$ . *SM*: Skillings-Mack statistic.

1202

1203 **Figure 7 – figure supplement 1**

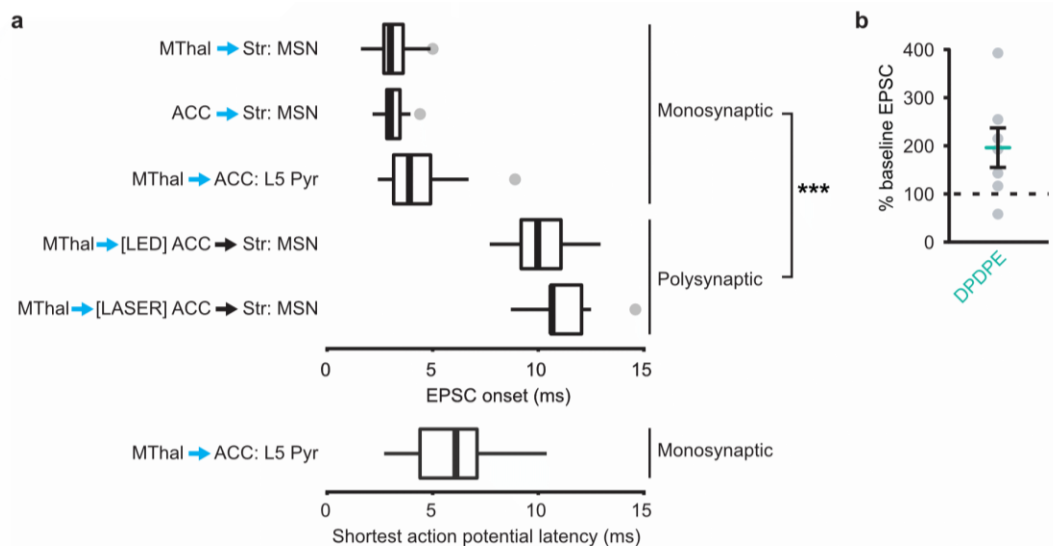

1204

1205 **EPSCs and action potential latencies within the thalamo-cortico-striatal circuits.**

1206 (A) Average onset time for monosynaptic and polysynaptic EPSCs using either full field (LED  
1207 stimulation: all monosynaptic data, and [LED] ACC polysynaptic data), or focal (laser  
1208 stimulation: [LASER] ACC polysynaptic data) optical stimulation. Mann-whitney U test,  $U =$   
1209 15,  $p < 0.001$ . \*\*\*  $p \leq 0.001$ . Box plot with median, 1<sup>st</sup> and 3<sup>rd</sup> quartile and whiskers represent  
1210 1.5 times interquartile range. Lower panel: average of shortest action potential onset latency in  
1211 L5 pyramidal neurons following stimulation of MThal terminals. Stimulation intensity was set to  
1212 elicit ~50% spike probability out of 50 trials. (B) EPSC amplitudes measured in MSNs in the  
1213 striatum (Str) evoked by optical stimulation of MThal terminals in the ACC in the presence of  
1214 DPDPE, plotted as a percentage of baseline EPSC.  $N = 6$ ,  $n = 7$ ,  $W(7) = 3$ ,  $p = 0.078$ . Mean  $\pm$   
1215 standard error of the mean.

1216
